# Supplementary material
Source: PubMed Central journal article supplement (PMC10114723)
Supplement: vg1c00029_si_001.pdf [file vg1c00029_si_001.pdf]

1 **Supporting Information:**  
2 **Changes in ozone chemical sensitivity in the U.S. from 2007 to 2016**

3  
4 Shannon Koplitz<sup>1</sup>, Heather Simon<sup>1</sup>, Barron Henderson<sup>1</sup>, Jennifer Liljegren<sup>2</sup>, Gail Tonnesen<sup>3</sup>, Andrew  
5 Whitehill<sup>4</sup>, Benjamin Wells<sup>1</sup>  
6

7 <sup>1</sup>Office of Air Quality Planning and Standards, U.S. Environmental Protection Agency

8 <sup>2</sup>Region 5, U.S. Environmental Protection Agency

9 <sup>3</sup>Region 8, U.S. Environmental Protection Agency

10 <sup>4</sup>Office of Research and Development, U.S. Environmental Protection Agency  
11  
12  
13  
14  
15

|    |                                                                                                             |           |
|----|-------------------------------------------------------------------------------------------------------------|-----------|
| 16 | <b>Table of Contents</b>                                                                                    |           |
| 17 |                                                                                                             |           |
| 18 | <b>Tables</b> .....                                                                                         | <b>4</b>  |
| 19 | Table S1. Modeled anthropogenic NOx and VOC emissions for 2007 and 2016 simulations .....                   | 4         |
| 20 | Table S2. Chemical regime determinations based on differences in May-Sep weekend and weekday                |           |
| 21 | MDA8 O <sub>3</sub> values .....                                                                            | 6         |
| 22 | Table S3. Chemical regime determinations based on differences in May-Sep weekend and                        |           |
| 23 | weekday MDA8 O <sub>3</sub> values at the monitor with the highest 2016 O <sub>3</sub> design value in each |           |
| 24 | nonattainment area .....                                                                                    | 8         |
| 25 | Table S4. Ypsilanti monitor MDA8 from the top 9 high days modeled in 2007, projected to                     |           |
| 26 | 2016, and modeled in the 2016.....                                                                          | 11        |
| 27 |                                                                                                             |           |
| 28 | <b>Figures</b> .....                                                                                        | <b>12</b> |
| 29 | <b>Monte Carlo day-of-week analysis testing</b> .....                                                       | 12        |
| 30 | Figure S1. Atlanta .....                                                                                    | 12        |
| 31 | Figure S2. Chicago .....                                                                                    | 13        |
| 32 | Figure S3. Houston .....                                                                                    | 13        |
| 33 | Figure S4. Los Angeles .....                                                                                | 14        |
| 34 |                                                                                                             |           |
| 35 | <b>Day-of-week barplots</b> .....                                                                           | 15        |
| 36 | Figure S5. Day-of-week MDA8 O <sub>3</sub> at the Northbrook, IL monitor (170314201) .....                  | 15        |
| 37 | Figure S6. Day-of-week MDA8 O <sub>3</sub> at the Gary, IN monitor (180890022).....                         | 16        |
| 38 | Figure S7. Day-of-week MDA8 O <sub>3</sub> at the monitor located southeast of O'Hare International         |           |
| 39 | airport (170311003) .....                                                                                   | 17        |
| 40 | Figure S8. Day-of-week MDA8 O <sub>3</sub> at the Cicero, IL monitor (170314002) .....                      | 18        |
| 41 | Figure S9. Day-of-week MDA8 O <sub>3</sub> at the Lemont, IL monitor (170311601) .....                      | 19        |
| 42 | Figure S10. Day-of-week MDA8 O <sub>3</sub> at the Kenosha, WI monitor (550590019) .....                    | 20        |
| 43 | Figure S11. Day-of-week MDA8 O <sub>3</sub> at the Hammond, IN monitor (180892008) .....                    | 21        |
| 44 | Figure S12. Day-of-week MDA8 O <sub>3</sub> at the Morton Arboretum, IL monitor (170436001) .....           | 22        |
| 45 | Figure S13. Day-of-week MDA8 O <sub>3</sub> at the New Haven, MI monitor (260990009) .....                  | 23        |
| 46 | Figure S14. Day-of-week MDA8 O <sub>3</sub> at the Port Huron, MI monitor (261470005) .....                 | 24        |
| 47 | Figure S15. Day-of-week MDA8 O <sub>3</sub> at the Warren, MI monitor (260991003) .....                     | 25        |
| 48 | Figure S16. Day-of-week MDA8 O <sub>3</sub> at the East 7 Mile, MI monitor (261630019) .....                | 26        |
| 49 | Figure S17. Day-of-week MDA8 O <sub>3</sub> at the Oak Park, MI monitor (261250001) .....                   | 27        |
| 50 | Figure S18. Day-of-week MDA8 O <sub>3</sub> at the Allen Park, MI monitor (261630001) .....                 | 28        |

51 Figure S19. Day-of-week MDA8 O<sub>3</sub> at the Ypsilanti, MI monitor (261610008) ..... 29

52

53 **Multi-panel plots of model-predicted average O<sub>3</sub> chemical formation regime**..... 30

54 Figure S20. Northeast ..... 30

55 Figure S21. Southeast ..... 31

56 Figure S22. Upper Midwest..... 32

57 Figure S23 Ohio River Valley ..... 33

58 Figure S24. South ..... 34

59 Figure S25 Northern Rockies and Plains ..... 35

60 Figure S26. Southwest ..... 36

61 Figure S27. Northwest ..... 37

62 Figure S28. West..... 38

63

64 **Ozone isopleth diagrams** ..... 39

65 Figure S29. O<sub>3</sub> isopleth diagrams for the monitor located southeast of O’Hare International

66 airport..... 39

67 Figure S30. O<sub>3</sub> isopleth diagrams for the Cicero, IL monitor ..... 40

68 Figure S31. O<sub>3</sub> isopleth diagrams for the Lemont, IL monitor..... 41

69 Figure S32. O<sub>3</sub> isopleth diagrams for the Kenosha, WI monitor..... 42

70 Figure S33. O<sub>3</sub> isopleth diagrams for the Hammond, IN monitor ..... 43

71 Figure S34. O<sub>3</sub> isopleth diagrams for the New Haven, MI monitor ..... 44

72 Figure S35. O<sub>3</sub> isopleth diagrams for the Port Huron, MI monitor ..... 45

73 Figure S36. O<sub>3</sub> isopleth diagrams for the Warren, MI monitor ..... 46

74 Figure S37. O<sub>3</sub> isopleth diagrams for the East 7 Mile, MI monitor ..... 47

75 Figure S38. O<sub>3</sub> isopleth diagrams for the Oak Park, MI monitor ..... 48

76 Figure S39. O<sub>3</sub> isopleth diagrams for the Allen Park, MI monitor ..... 49

77 Figure S40. O<sub>3</sub> isopleth diagrams for the Ypsilanti, MI monitor ..... 50

78

79 Figure S41. Multi-panel plot of observed and modeled WE-WD differentials and O<sub>3</sub> response to 20%

80 NOx cut calculated with the HDDM sensitivities..... 51

81 Figure S42. Non-attainment area WE-WD temperature differentials..... 52

82

83

84

85 Table S1. Modeled anthropogenic NO<sub>x</sub> and VOC emissions for 2007 and 2016 simulations.

| state                           | VOC         |             |                         | NO <sub>x</sub> |             |                         |
|---------------------------------|-------------|-------------|-------------------------|-----------------|-------------|-------------------------|
|                                 | 2007 (tons) | 2016 (tons) | % change<br>(2016-2007) | 2007 (tons)     | 2016 (tons) | % change<br>(2016-2007) |
| <b>Alabama</b>                  | 410,008     | 388,485     | -5.2%                   | 419636          | 281698      | -32.9%                  |
| <b>Arizona</b>                  | 255,738     | 240,967     | -5.8%                   | 323376          | 183004      | -43.4%                  |
| <b>Arkansas</b>                 | 308,889     | 379,139     | 22.7%                   | 239762          | 181729      | -24.2%                  |
| <b>California</b>               | 1,146,194   | 1,322,224   | 15.4%                   | 1008339         | 531648      | -47.3%                  |
| <b>Colorado</b>                 | 333,995     | 276,843     | -17.1%                  | 306532          | 223686      | -27.0%                  |
| <b>Connecticut</b>              | 88,514      | 77,123      | -12.9%                  | 100091          | 54490       | -45.6%                  |
| <b>Delaware</b>                 | 29,192      | 18,735      | -35.8%                  | 48138           | 24112       | -49.9%                  |
| <b>District of<br/>Columbia</b> | 10,571      | 8,357       | -20.9%                  | 13269           | 7515        | -43.4%                  |
| <b>Florida</b>                  | 873,743     | 674,565     | -22.8%                  | 935493          | 495966      | -47.0%                  |
| <b>Georgia</b>                  | 636,242     | 529,453     | -16.8%                  | 642853          | 317161      | -50.7%                  |
| <b>Idaho</b>                    | 615,961     | 378,552     | -38.5%                  | 99071           | 89296       | -9.9%                   |
| <b>Illinois</b>                 | 460,970     | 380,843     | -17.4%                  | 694161          | 377208      | -45.7%                  |
| <b>Indiana</b>                  | 327,805     | 267,135     | -18.5%                  | 563814          | 331265      | -41.2%                  |
| <b>Iowa</b>                     | 179,029     | 200,907     | 12.2%                   | 279672          | 180458      | -35.5%                  |
| <b>Kansas</b>                   | 278,501     | 290,110     | 4.2%                    | 321857          | 240720      | -25.2%                  |
| <b>Kentucky</b>                 | 230,957     | 347,315     | 50.4%                   | 417682          | 237296      | -43.2%                  |
| <b>Louisiana</b>                | 481,043     | 724,381     | 50.6%                   | 543347          | 348429      | -35.9%                  |
| <b>Maine</b>                    | 79,529      | 56,771      | -28.6%                  | 74939           | 45785       | -38.9%                  |
| <b>Maryland</b>                 | 158,045     | 112,581     | -28.8%                  | 240267          | 119404      | -50.3%                  |
| <b>Massachusetts</b>            | 172,631     | 138,330     | -19.9%                  | 179821          | 116785      | -35.1%                  |
| <b>Michigan</b>                 | 503,108     | 370,754     | -26.3%                  | 606407          | 327744      | -46.0%                  |
| <b>Minnesota</b>                | 397,625     | 572,937     | 44.1%                   | 435225          | 234023      | -46.2%                  |
| <b>Mississippi</b>              | 255,017     | 211,462     | -17.1%                  | 263627          | 150342      | -43.0%                  |
| <b>Missouri</b>                 | 354,001     | 472,624     | 33.5%                   | 478210          | 323218      | -32.4%                  |
| <b>Montana</b>                  | 350,865     | 212,660     | -39.4%                  | 155666          | 105102      | -32.5%                  |
| <b>Nebraska</b>                 | 102,386     | 96,488      | -5.8%                   | 234450          | 158917      | -32.2%                  |
| <b>Nevada</b>                   | 124,489     | 85,794      | -31.1%                  | 110055          | 71136       | -35.4%                  |
| <b>New<br/>Hampshire</b>        | 55,397      | 39,178      | -29.3%                  | 54087           | 33386       | -38.3%                  |
| <b>New Jersey</b>               | 238,943     | 160,792     | -32.7%                  | 270176          | 136539      | -49.5%                  |
| <b>New Mexico</b>               | 183,200     | 302,826     | 65.3%                   | 220065          | 179884      | -18.3%                  |
| <b>New York</b>                 | 503,981     | 386,431     | -23.3%                  | 488560          | 282666      | -42.1%                  |
| <b>North<br/>Carolina</b>       | 530,243     | 540,017     | 1.8%                    | 470671          | 274418      | -41.7%                  |
| <b>North Dakota</b>             | 55,742      | 531,851     | 854.1%                  | 158412          | 158627      | 0.1%                    |
| <b>Ohio</b>                     | 444,929     | 373,759     | -16.0%                  | 771219          | 361919      | -53.1%                  |
| <b>Oklahoma</b>                 | 496,050     | 572,874     | 15.5%                   | 426475          | 324256      | -24.0%                  |
| <b>Oregon</b>                   | 409,074     | 468,012     | 14.4%                   | 186806          | 127172      | -31.9%                  |
| <b>Pennsylvania</b>             | 435,528     | 513,199     | 17.8%                   | 642934          | 409785      | -36.3%                  |
| <b>Rhode Island</b>             | 25,122      | 21,982      | -12.5%                  | 22780           | 21849       | -4.1%                   |

|                       |            |            |        |          |          |        |
|-----------------------|------------|------------|--------|----------|----------|--------|
| <b>South Carolina</b> | 271,968    | 228,420    | -16.0% | 259348   | 162372   | -37.4% |
| <b>South Dakota</b>   | 76,243     | 141,167    | 85.2%  | 76331    | 54238    | -28.9% |
| <b>Tennessee</b>      | 313,919    | 363,226    | 15.7%  | 455825   | 249996   | -45.2% |
| <b>Texas</b>          | 2,367,214  | 1,946,787  | -17.8% | 1651844  | 1114117  | -32.6% |
| <b>Utah</b>           | 241,181    | 211,955    | -12.1% | 218065   | 145529   | -33.3% |
| <b>Vermont</b>        | 29,224     | 26,846     | -8.1%  | 22380    | 14043    | -37.3% |
| <b>Virginia</b>       | 336,864    | 291,636    | -13.4% | 408377   | 238065   | -41.7% |
| <b>Washington</b>     | 451,071    | 374,690    | -16.9% | 341231   | 217652   | -36.2% |
| <b>West Virginia</b>  | 105,294    | 240,617    | 128.5% | 283523   | 164021   | -42.1% |
| <b>Wisconsin</b>      | 326,001    | 229,453    | -29.6% | 314846   | 206884   | -34.3% |
| <b>Wyoming</b>        | 255,149    | 437,101    | 71.3%  | 243837   | 155264   | -36.3% |
| <b>National</b>       | 17,317,384 | 17,240,984 | -0.4%  | 17723555 | 10832402 | -38.9% |

86

87

88 **Table S2: Chemical regime determinations based on differences in May-Sep weekend and weekday**  
89 **MDA8 O<sub>3</sub> values. “NO<sub>x</sub> Lim” (NO<sub>x</sub>-limited) or “NO<sub>x</sub> Sat” (NO<sub>x</sub>-saturated) categorization indicate**  
90 **Welch’s t test p-values for mean WE-WD differences of less than 0.05. Double asterisks (\*\*)**  
91 **indicate p-values less than 0.01. Italics indicate different categorization between the measured and**  
92 **modeled values. Bold indicates different signs for the measured and modeled WE-WD differences.**

| Region        | Area                   | Weekend – Weekday Differences (ppb) |                                  |              |                                  |          |                           |         |                           |
|---------------|------------------------|-------------------------------------|----------------------------------|--------------|----------------------------------|----------|---------------------------|---------|---------------------------|
|               |                        | 2007                                |                                  |              |                                  | 2016     |                           |         |                           |
|               |                        | Measured                            |                                  | Modeled      |                                  | Measured |                           | Modeled |                           |
|               |                        | mean                                | category                         | mean         | category                         | mean     | category                  | mean    | category                  |
| Northeast     | Baltimore              | -5.3**                              | <i>NO<sub>x</sub> Lim</i>        | -2.3         | <i>Mixed</i>                     | -6.9**   | NO <sub>x</sub> Lim       | -5.2**  | NO <sub>x</sub> Lim       |
|               | Greater Connecticut    | -7.2**                              | <i>NO<sub>x</sub> Lim</i>        | -1.7         | <i>Mixed</i>                     | -6.2**   | NO <sub>x</sub> Lim       | -3.5    | NO <sub>x</sub> Lim       |
|               | New York               | -3.3**                              | <i>NO<sub>x</sub> Lim</i>        | 1.0          | <i>Mixed</i>                     | -4.6**   | NO <sub>x</sub> Lim       | -2.2**  | NO <sub>x</sub> Lim       |
|               | Philadelphia           | -4.1**                              | <i>NO<sub>x</sub> Lim</i>        | -0.3         | <i>Mixed</i>                     | -5.0**   | NO <sub>x</sub> Lim       | -3.7**  | NO <sub>x</sub> Lim       |
|               | Washington             | -4.8**                              | <i>NO<sub>x</sub> Lim</i>        | -1.4         | <i>Mixed</i>                     | -5.3**   | NO <sub>x</sub> Lim       | -3.9**  | NO <sub>x</sub> Lim       |
| Southeast     | Atlanta                | -1.6                                | Mixed                            | 0.3          | Mixed                            | -5.8**   | NO <sub>x</sub> Lim       | -4.9**  | NO <sub>x</sub> Lim       |
| Ohio Valley   | Chicago                | <b>-0.5</b>                         | <b><i>Mixed</i></b>              | <b>2.6**</b> | <b><i>NO<sub>x</sub> Sat</i></b> | -1.8**   | NO <sub>x</sub> Lim       | -1.9**  | NO <sub>x</sub> Lim       |
|               | Cincinnati             | 0.1                                 | Mixed                            | -0.8         | Mixed                            | -0.3     | Mixed                     | -0.4    | Mixed                     |
|               | Cleveland              | -7.7**                              | NO <sub>x</sub> Lim              | -4.6**       | NO <sub>x</sub> Lim              | -4.3**   | <i>NO<sub>x</sub> Lim</i> | -1.7    | <i>Mixed</i>              |
|               | Columbus               | -5.5**                              | NO <sub>x</sub> Lim              | -4.2**       | NO <sub>x</sub> Lim              | -3.8**   | <i>NO<sub>x</sub> Lim</i> | -1.5    | <i>Mixed</i>              |
|               | Louisville             | -0.4                                | Mixed                            | 1.4          | Mixed                            | -0.5     | Mixed                     | -0.9    | Mixed                     |
|               | St. Louis              | <b>-1.4</b>                         | <b><i>Mixed</i></b>              | <b>4.6**</b> | <b><i>NO<sub>x</sub> Sat</i></b> | -2.1     | <i>NO<sub>x</sub> Lim</i> | -0.7    | <i>Mixed</i>              |
| Upper Midwest | Allegan Co, MI         | -4.7                                | Mixed                            | -1.6         | Mixed                            | -6.1     | NO <sub>x</sub> Lim       | -5.8    | NO <sub>x</sub> Lim       |
|               | Berrien Co, MI         | -4.6                                | Mixed                            | -2.6         | Mixed                            | -5.2     | Mixed                     | -5.5    | Mixed                     |
|               | Detroit                | -5.8**                              | <i>NO<sub>x</sub> Lim</i>        | -1.3         | <i>Mixed</i>                     | -3.2**   | NO <sub>x</sub> Lim       | -3.7**  | NO <sub>x</sub> Lim       |
|               | Door Co, WI            | -2.9                                | Mixed                            | -1.9         | Mixed                            | -1.0     | Mixed                     | -0.1    | Mixed                     |
|               | Manitowoc Co, WI       | -1.3                                | Mixed                            | 0.4          | Mixed                            | -2.1     | Mixed                     | -3.1    | Mixed                     |
|               | Muskegon Co, WI        | -6.2                                | Mixed                            | -1.1         | Mixed                            | -3.9     | Mixed                     | -4.3    | Mixed                     |
|               | Northern Milwaukee     | 0.1                                 | Mixed                            | 2.1          | Mixed                            | -2.6     | Mixed                     | -2.5    | Mixed                     |
|               | Sheboygan Co, WI       | -1.9                                | Mixed                            | 0.7          | Mixed                            | -2.7     | Mixed                     | -3.2    | Mixed                     |
| South         | Dallas                 | <b>-2.2</b>                         | <b><i>NO<sub>x</sub> Lim</i></b> | <b>5.0**</b> | <b><i>NO<sub>x</sub> Sat</i></b> | -3.1**   | NO <sub>x</sub> Lim       | -2.1**  | NO <sub>x</sub> Lim       |
|               | Houston                | 2.4                                 | NO <sub>x</sub> Sat              | 6.4**        | NO <sub>x</sub> Sat              | -2.3**   | NO <sub>x</sub> Lim       | -7.1**  | NO <sub>x</sub> Lim       |
|               | San Antonio            | 1.8                                 | Mixed                            | 2.0          | Mixed                            | -3.1     | NO <sub>x</sub> Lim       | -5.2**  | NO <sub>x</sub> Lim       |
| Southwest     | Denver                 | 2.2                                 | NO <sub>x</sub> Sat              | 6.1          | NO <sub>x</sub> Sat              | -1.2     | Mixed                     | -0.5    | Mixed                     |
|               | Dona Ana Co, NM        | 1.7                                 | <i>Mixed</i>                     | 3.3          | <i>NO<sub>x</sub> Sat</i>        | 2.3      | <i>Mixed</i>              | 2.8     | <i>NO<sub>x</sub> Sat</i> |
|               | Northern Wasatch Front | 1.7                                 | NO <sub>x</sub> Sat              | 3.1**        | NO <sub>x</sub> Sat              | -0.4     | <i>Mixed</i>              | -1.6    | <i>NO<sub>x</sub> Lim</i> |

|                       |                                        |                     |                     |        |                     |                     |                     |                     |                     |
|-----------------------|----------------------------------------|---------------------|---------------------|--------|---------------------|---------------------|---------------------|---------------------|---------------------|
|                       | <b>Phoenix</b>                         | -2.6**              | NO <sub>x</sub> Lim | -1.5   | NO <sub>x</sub> Lim | -1.1**              | NO <sub>x</sub> Lim | -0.2                | Mixed               |
|                       | <b>Southern Wasatch Front</b>          | 0.3                 | Mixed               | 2.6    | NO <sub>x</sub> Sat | -1.2                | Mixed               | -1.3                | Mixed               |
| <b>West</b>           | <b>Amador Co, CA</b>                   | -5.6                | NO <sub>x</sub> Lim | -5.0   | NO <sub>x</sub> Lim | -2.9                | Mixed               | -3.6                | Mixed               |
|                       | <b>Butte Co, CA</b>                    | -6.5                | NO <sub>x</sub> Lim | -4.7   | Mixed               | -5.1**              | NO <sub>x</sub> Lim | -5.5**              | NO <sub>x</sub> Lim |
|                       | <b>Calaveras Co, CA</b>                | -5.2                | NO <sub>x</sub> Lim | -4.2   | Mixed               | -2.9                | Mixed               | -3.3                | Mixed               |
|                       | <b>Imperial Co, CA</b>                 | -2.3                | Mixed               | -3.4** | NO <sub>x</sub> Lim | -5.1**              | NO <sub>x</sub> Lim | -6.0**              | NO <sub>x</sub> Lim |
|                       | <b>Kern</b>                            | 0.7                 | Mixed               | -2.3   | Mixed               | -3.8                | Mixed               | -2.0                | Mixed               |
|                       | <b>Las Vegas</b>                       | 0.3                 | Mixed               | -0.4   | Mixed               | -1.2                | Mixed               | 0.4                 | Mixed               |
|                       | <b>Los Angeles</b>                     | 11.4**              | NO <sub>x</sub> Sat | 12.2** | NO <sub>x</sub> Sat | -1.8                | NO <sub>x</sub> Lim | 1.3                 | Mixed               |
|                       | <b>Mariposa Co, CA</b>                 | 0.1                 | Mixed               | -0.9   | Mixed               | -1.1                | Mixed               | -1.2                | Mixed               |
|                       | <b>Morongo Band of Mission Indians</b> | 1.0                 | Mixed               | 4.1    | Mixed               | -9.4**              | NO <sub>x</sub> Lim | -5.8**              | NO <sub>x</sub> Lim |
|                       | <b>Nevada Co, CA</b>                   | -4.7                | NO <sub>x</sub> Lim | -3.9   | NO <sub>x</sub> Lim | -5.3                | Mixed               | -5.9                | NO <sub>x</sub> Lim |
|                       | <b>Riverside</b>                       | -0.6                | Mixed               | 0.0    | Mixed               | -6.8**              | NO <sub>x</sub> Lim | -4.2**              | NO <sub>x</sub> Lim |
|                       | <b>Sacramento</b>                      | -4.8**              | NO <sub>x</sub> Lim | -3.6** | NO <sub>x</sub> Lim | -2.4**              | NO <sub>x</sub> Lim | -3.4**              | NO <sub>x</sub> Lim |
|                       | <b>San Bernardino</b>                  | 1.9                 | Mixed               | 2.1    | NO <sub>x</sub> Sat | -6.3**              | NO <sub>x</sub> Lim | -4.2**              | NO <sub>x</sub> Lim |
|                       | <b>San Diego</b>                       | 4.1**               | NO <sub>x</sub> Sat | 3.2**  | NO <sub>x</sub> Sat | -0.8                | Mixed               | 1.5                 | Mixed               |
|                       | <b>San Francisco</b>                   | -1.7**              | NO <sub>x</sub> Lim | -3.7** | NO <sub>x</sub> Lim | 2.1**               | NO <sub>x</sub> Sat | 2.6**               | NO <sub>x</sub> Sat |
|                       | <b>San Joaquin Valley</b>              | -3.1**              | NO <sub>x</sub> Lim | -3.2** | NO <sub>x</sub> Lim | -2.5**              | NO <sub>x</sub> Lim | -2.5**              | NO <sub>x</sub> Lim |
|                       | <b>San Luis Obispo</b>                 | -4.4                | NO <sub>x</sub> Lim | -2.8   | NO <sub>x</sub> Lim | -2.6                | Mixed               | -1.0                | Mixed               |
|                       | <b>Sutter Buttes</b>                   | -6.6**              | NO <sub>x</sub> Lim | -4.7   | NO <sub>x</sub> Lim | -3.8                | Mixed               | -4.7                | NO <sub>x</sub> Lim |
|                       | <b>Tuolumne Co, CA</b>                 | -3.6                | Mixed               | -2.8   | Mixed               | -1.6                | Mixed               | -2.2                | Mixed               |
|                       | <b>Tuscan Buttes</b>                   | -6.2                | NO <sub>x</sub> Lim | -5.0   | NO <sub>x</sub> Lim | -5.9                | NO <sub>x</sub> Lim | -4.5                | NO <sub>x</sub> Lim |
| <b>Ventura Co, CA</b> | 3.8**                                  | NO <sub>x</sub> Sat | 0.4                 | Mixed  | -3.6**              | NO <sub>x</sub> Lim | -3.6**              | NO <sub>x</sub> Lim |                     |

93

94

95 Table S3: Chemical regime determinations based on differences in May-Sep weekend and weekday MDA8 O<sub>3</sub> values at the monitor  
 96 with the highest 2016 O<sub>3</sub> design value in each nonattainment area. NO<sub>x</sub> Lim or NO<sub>x</sub> Sat categorization indicate t test p-values for  
 97 mean WE-WD differences of less than 0.05. Double asterisks (\*\*) indicate p-values less than 0.01.

98

| region        | Site number | area                | Weekend – Weekday Differences (ppb) |         |          |       |          |         |          |         |
|---------------|-------------|---------------------|-------------------------------------|---------|----------|-------|----------|---------|----------|---------|
|               |             |                     | 2007                                |         |          |       | 2016     |         |          |         |
|               |             |                     | Measured                            |         | Measured |       | Measured |         | Measured |         |
| mean          | mean        | mean                | mean                                | mean    | mean     | mean  | mean     |         |          |         |
| Northeast     | 240251001   | Baltimore           | -5.7                                | mixed   | -1.5     | mixed | -6.8     | Nox Lim | -6.3     | mixed   |
|               | 90110124    | Greater Connecticut | -4.3                                | mixed   | 2.1      | mixed | -5.8     | mixed   | -5.7     | mixed   |
|               | 90019003    | New York            | -4.1                                | mixed   | -0.3     | mixed | -6.5     | mixed   | -2.3     | mixed   |
|               | 421010024   | Philadelphia        | -4.6                                | mixed   | 2.7      | mixed | -4.6     | mixed   | -1.7     | mixed   |
|               | 240338003   | Washington          | -5.6                                | mixed   | -4.1     | mixed | -5.5     | Nox Lim | -5.1     | mixed   |
| Southeast     | 131210055   | Atlanta             | -1.5                                | mixed   | 2.9      | mixed | -5.8     | mixed   | -4.0     | mixed   |
| Ohio Valley   | 550590019   | Chicago             | 0.0                                 | mixed   | 2.5      | mixed | -3.9     | mixed   | -2.5     | mixed   |
|               | 390610006   | Cincinnati          | 1.0                                 | mixed   | 0.2      | mixed | 0.3      | mixed   | 0.6      | mixed   |
|               | 390850003   | Cleveland           | -8.9**                              | Nox Lim | -1.3     | mixed | -5.5     | mixed   | -1.2     | mixed   |
|               | 390490029   | Columbus            | -7.5                                | Nox Lim | -4.2     | mixed | -4.5     | Nox Lim | -1.8     | mixed   |
|               | 180190008   | Louisville          | -2.9                                | mixed   | -1.2     | mixed | -2.0     | mixed   | -1.8     | mixed   |
|               | 180431004   | Louisville          | -0.1                                | mixed   | 1.7      | mixed | -1.2     | mixed   | -2.3     | mixed   |
|               | 291831002   | St. Louis           | -3.7                                | mixed   | 4.0      | mixed | -3.2     | mixed   | -1.5     | mixed   |
| Upper Midwest | 260050003   | Allegan Co, MI      | -4.7                                | mixed   | -1.6     | mixed | -6.1     | Nox Lim | -5.8     | Nox Lim |
|               | 260210014   | Berrien Co, MI      | -4.6                                | mixed   | -2.6     | mixed | -5.2     | mixed   | -5.5     | mixed   |
|               | 261630019   | Detroit             | -6.9                                | mixed   | 1.3      | mixed | -4.8     | mixed   | -2.9     | mixed   |
|               | 550290004   | Door Co, WI         | -2.9                                | mixed   | -1.9     | mixed | -1.0     | mixed   | -0.1     | mixed   |
|               | 550710007   | Manitowoc Co, WI    | -1.3                                | mixed   | 0.4      | mixed | -2.1     | mixed   | -3.1     | mixed   |
|               | 261210039   | Muskegon Co, MI     | -6.2                                | mixed   | -1.1     | mixed | -3.9     | mixed   | -4.3     | mixed   |
|               | 550890009   | Northern Milwaukee  | -0.3                                | mixed   | 1.0      | mixed | -2.5     | mixed   | -3.5     | mixed   |
|               | 551170006   | Sheboygan Co, MI    | -1.9                                | mixed   | 0.7      | mixed | -2.7     | mixed   | -3.2     | mixed   |
| South         | 482010024   | Houston             | 1.4                                 | mixed   | 6.7      | mixed | -3.2     | mixed   | -7.1     | Nox Lim |
|               | 480290032   | San Antonio         | 2.7                                 | mixed   | 3.7      | mixed | -3.1     | mixed   | -5.1     | mixed   |



|           |                |                                 |         |         |        |         |         |         |       |         |
|-----------|----------------|---------------------------------|---------|---------|--------|---------|---------|---------|-------|---------|
|           | 481210034      | Dallas                          | -4.8    | mixed   | 5.3    | mixed   | -5.1    | mixed   | -3.7  | mixed   |
| Southwest | 80590011       | Denver                          | 1.6     | mixed   | 7.6    | Nox Sat | -2.0    | mixed   | 0.6   | mixed   |
|           | 350130022      | Dona Ana Co, NM                 | 1.8     | mixed   | 2.1    | mixed   | 2.2     | mixed   | 2.4   | mixed   |
|           | 350130021      | Dona Ana Co, NM                 | 1.6     | mixed   | 3.9    | mixed   | 2.3     | mixed   | 3.2   | mixed   |
|           | 490353006      | Northern Wasatch Front, UT      | 3.2     | mixed   | 4.0    | mixed   | 1.1     | mixed   | -1.3  | mixed   |
|           | 40132005       | Phoenix                         | -5.1    | Nox Lim | -2.3   | mixed   | -1.9    | mixed   | -3.1  | mixed   |
|           | 40139997       | Phoenix                         | -0.3    | mixed   | 3.1    | mixed   | -1.4    | mixed   | 1.7   | mixed   |
|           | 490490002      | Southern Wasatch Front, UT      | 1.4     | mixed   | 2.7    | mixed   | -0.2    | mixed   | -0.9  | mixed   |
|           | 490471002      | Uinta Basin, UT                 | -1.5    | mixed   | 1.5    | mixed   | 0.1     | mixed   | -0.3  | mixed   |
| West      | 60050002       | Amador Co, CA                   | -5.6    | Nox Lim | -5.0   | Nox Lim | -2.9    | mixed   | -3.6  | mixed   |
|           | 60070007       | Butte Co, CA                    | -6.5    | Nox Lim | -4.7   | mixed   | -6.0    | Nox Lim | -5.7  | Nox Lim |
|           | 60090001       | Calaveras Co, CA                | -5.2    | Nox Lim | -4.2   | mixed   | -2.9    | mixed   | -3.3  | mixed   |
|           | 60250005       | Imperial Co, CA                 | -1.6    | mixed   | -4.6   | mixed   | -3.2    | mixed   | -5.8  | Nox Lim |
|           | 60290011       | Kern Co, CA                     | 0.7     | mixed   | -2.3   | mixed   | -3.8    | mixed   | -2.0  | mixed   |
|           | 320030075      | Las Vegas                       | 0.5     | mixed   | -1.1   | mixed   | -2.2    | mixed   | -0.6  | mixed   |
|           | 60658001       | Los Angeles                     | 9.0**   | Nox Sat | 16.4** | Nox Sat | -3.4    | mixed   | 1.4   | mixed   |
|           | 60376012       | Los Angeles                     | 8.9     | Nox Sat | 6.0    | mixed   | -7.1    | Nox Lim | -4.1  | mixed   |
|           | 60430003       | Mariposa Co, CA                 | -1.6    | mixed   | -1.4   | mixed   | 0.1     | mixed   | -0.4  | mixed   |
|           | 60650012       | Morongo Band of Mission Indians | 0.1     | mixed   | 5.2    | Nox Sat | -10.7** | Nox Lim | -5.7  | Nox Lim |
|           | 60570005       | Nevada Co, CA                   | -5.7    | mixed   | -3.9   | mixed   | -5.3    | mixed   | -5.9  | Nox Lim |
|           | 60655001       | Riverside Co, CA                | 2.2     | mixed   | 0.1    | mixed   | -9.5**  | Nox Lim | -5.5  | Nox Lim |
|           | 60170010       | Sacramento                      | -5.5    | mixed   | -4.1   | mixed   | -5.3    | mixed   | -4.7  | mixed   |
|           | 60731006       | San Diego Co, CA                | 4.1     | mixed   | -0.6   | mixed   | -4.3    | mixed   | -1.2  | mixed   |
|           | 60010007       | San Francisco Bay Area          | -1.9    | mixed   | -4.0   | mixed   | 0.8     | mixed   | 3.7   | mixed   |
|           | 60194001       | San Joaquin Valley              | -2.3    | mixed   | -4.3   | mixed   | -6.5    | Nox Lim | -4.3  | mixed   |
|           | 60798005       | San Luis Obispo                 | -4.7    | mixed   | -2.7   | mixed   | -2.2    | mixed   | -1.4  | mixed   |
|           | 61010004       | Sutter Buttes                   | -6.6    | Nox Lim | -4.7   | Nox Lim | -3.8    | mixed   | -4.7  | Nox Lim |
|           | 61090005       | Tuolumne Co, CA                 | -3.6    | mixed   | -2.8   | mixed   | -1.6    | mixed   | -2.2  | mixed   |
|           | 61030004       | Tuscan Buttes, CA               | -6.2    | Nox Lim | -5.0   | Nox Lim | -5.9    | Nox Lim | -4.5  | Nox Lim |
| 61112002  | Ventura Co, CA | 6.8                             | Nox Sat | 0.8     | mixed  | -5.2    | Nox Lim | -4.7    | mixed |         |



101 Table S4. Ypsilanti monitor MDA8 from the top 9 high days modeled in the 2007 simulation,  
 102 these same days projected to 2016 values using the 2007 HDDM sensitivities and assuming 2016  
 103 emission levels (0.55 NO<sub>x</sub> and 0.75 VOC of 2007 emissions), and the top 9 high days modeled in  
 104 the 2016 simulation. Averages across each set of 9 days are shown in bold italics in the bottom  
 105 row.

| <b>Modeled 2007</b> | <b>Projected 2016</b> | <b>Modeled 2016</b> |
|---------------------|-----------------------|---------------------|
| 79.68               | 73.01                 | 77.14               |
| 79.43               | 71.81                 | 71.92               |
| 79.21               | 79.67                 | 71.13               |
| 77.72               | 69.15                 | 65.65               |
| 75.43               | 65.54                 | 63.67               |
| 72.64               | 73.39                 | 63.19               |
| 72.63               | 70.90                 | 62.38               |
| 70.55               | 65.32                 | 62.03               |
| 70.05               | 71.68                 | 61.61               |
| <b><i>75.26</i></b> | <b><i>71.16</i></b>   | <b><i>66.52</i></b> |

106

107

108 **Monte Carlo DOW Analysis Testing**

109 To investigate the sensitivity of our DOW analysis results to the observations used, we  
110 performed Monte Carlo analyses for four of the most populated non-attainment areas in our  
111 study: Atlanta, Chicago, Houston, and Los Angeles. For each area, 1000 Monte Carlo  
112 simulations were performed. For each case, weekday values were randomly sampled without  
113 replacement and the Welch's t-test comparison was re-run for the weekend vs. re-sampled  
114 weekday values. This was repeated 100 times and the distributions of p-values and WE-WD  
115 differences were recorded. Blue stars indicate values from the original analysis that includes all  
116 weekday data.

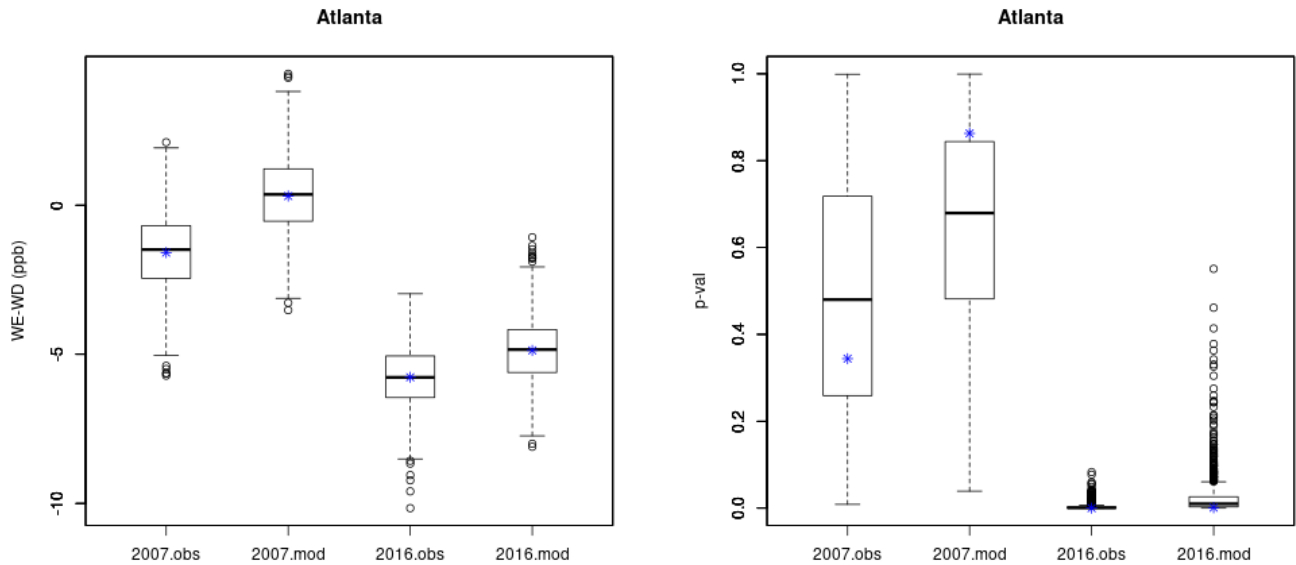

117  
118

119 Figure S1. Monte Carlo results to randomize observations selected in DOW analysis – Atlanta.  
120 For 2007, both the modeled and observed distributions have insignificant p-values and ranges of  
121 WE-WD differences that cross 0. For 2016, both the modeled and observed distributions have  
122 consistently negative WE-WD differences and mostly significant p-values (there are some outlier  
123 insignificant p-values in the modeled dataset).

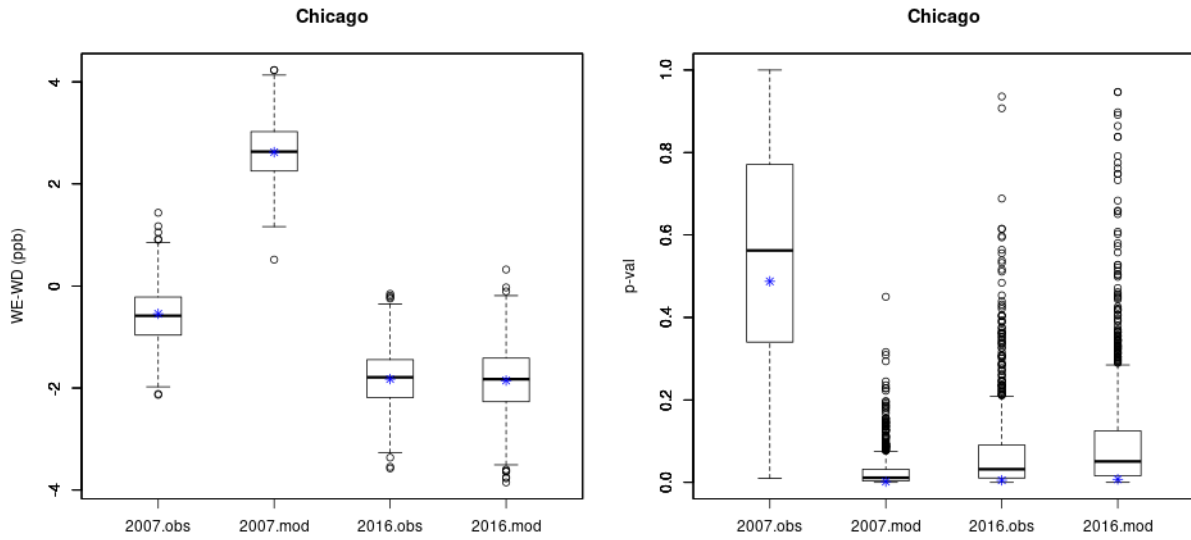

124

125 Figure S2. Monte Carlo results to randomize observations selected in DOW analysis – Chicago.  
 126 For 2007, the observations have insignificant p-values and ranges of WE-WD differences that  
 127 cross 0. Modeled values for 2007 have mostly significant p-values and consistently positive WE-  
 128 WD differences. In 2016, both the modeled and observed values have consistently negative WE-  
 129 WD differences and generally significant p-values, although the non-outlier range for the p-  
 130 values goes up to 0.2 for the observations and 0.3 for the model.

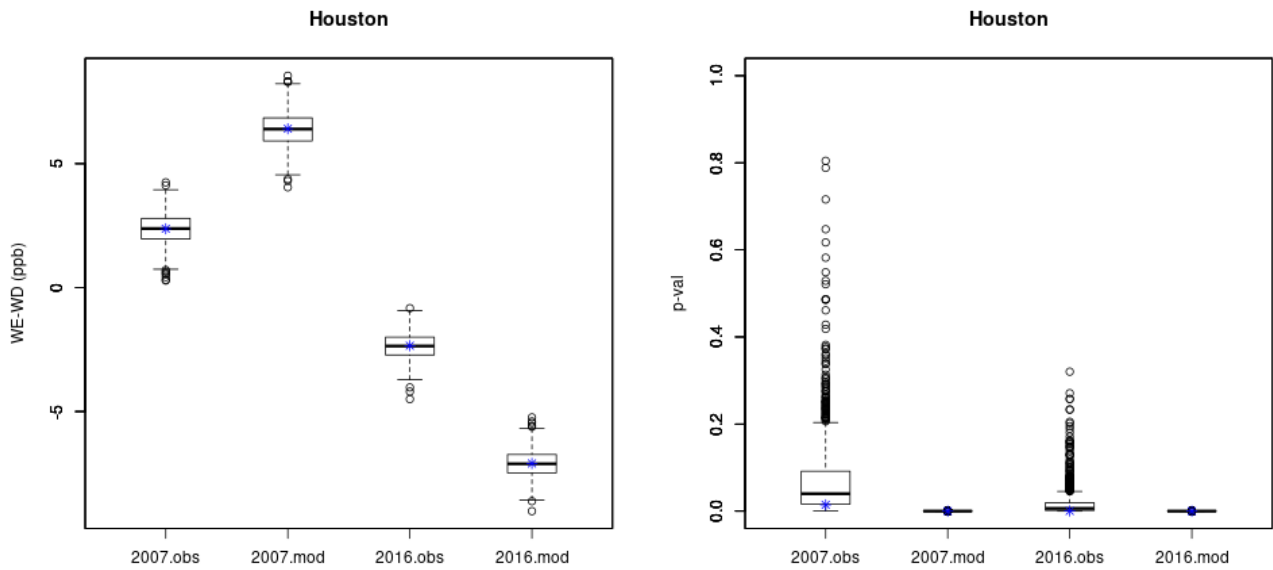

131

132 Figure S3. Monte Carlo results to randomize observations selected in DOW analysis – Houston.  
 133 In 2007, both the modeled and observed distributions have generally significant p-values and  
 134 positive WE-WD differences. Observed p-values have a wider range and WE-WD differences  
 135 are less positive. In 2016, both the modeled and observed distributions have consistently  
 136 negative WE-WD differences and mostly significant p-values (there are some insignificant  
 137 outlier p-values in the 2016 observational dataset).

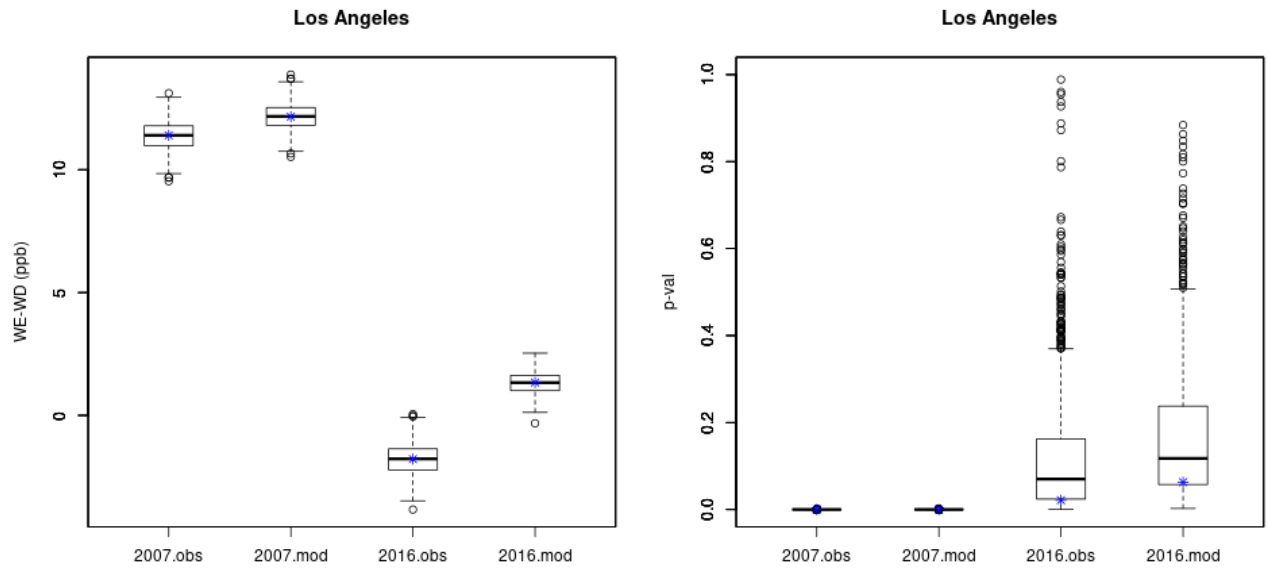

138

139 Figure S4. Monte Carlo results to randomize observations selected in DOW analysis – Los  
 140 Angeles. In 2007, both the modeled and observed distributions have significant p-values and  
 141 consistently positive WE-WD differences. In 2016, both the modeled and observed distributions  
 142 have ranges of WE-WD differences that cross 0 and mostly insignificant p-values (original 2016  
 143 observational p-value was less than 0.05 but above 0.01).

144

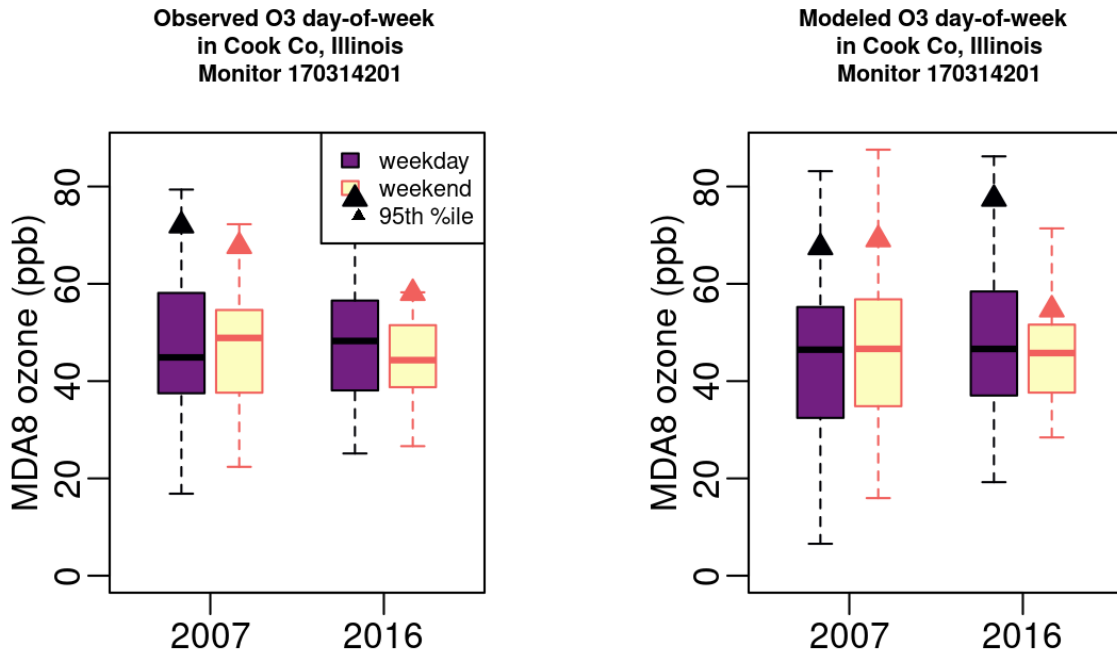

145

146 Figure S5. May-September weekday versus weekend MDA8 O3 at the Northbrook, IL monitor  
 147 (170314201) for 2007 and 2016 based on monitored values (left panel) and modeled values in  
 148 grid cells containing monitor location (right panel). Boxes represent the 25th-75th percentile,  
 149 horizontal lines represent median values, whiskers extend to  $1.5 \times$  the interquartile range, dots  
 150 show outlier values and triangles represent 95th percentile values. Boxplot pairs that have  
 151 statistically different distributions on weekends versus weekdays are outlined in bold.

152

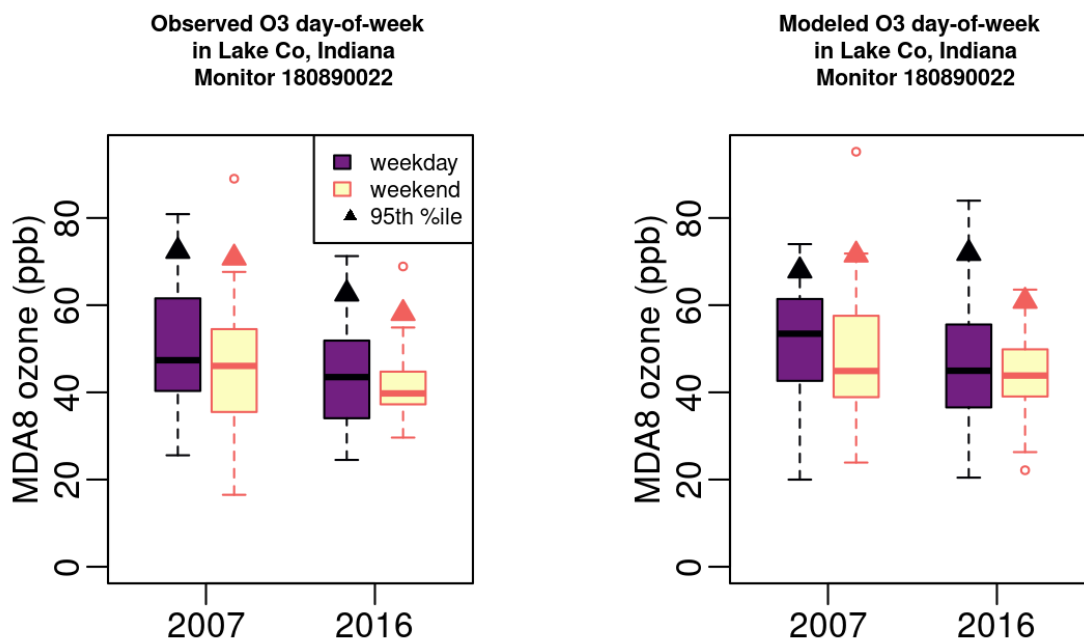

153

154 Figure S6. May-September weekday versus weekend MDA8 O3 at the Gary, IN monitor  
 155 (180890022) for 2007 and 2016 based on monitored values (left panel) and modeled values in  
 156 grid cells containing monitor location (right panel). Boxes represent the 25th-75th percentile,  
 157 horizontal lines represent median values, whiskers extend to  $1.5 \times$  the interquartile range, dots  
 158 show outlier values and triangles represent 95th percentile values. Boxplot pairs that have  
 159 statistically different distributions on weekends versus weekdays are outlined in bold.

160

161



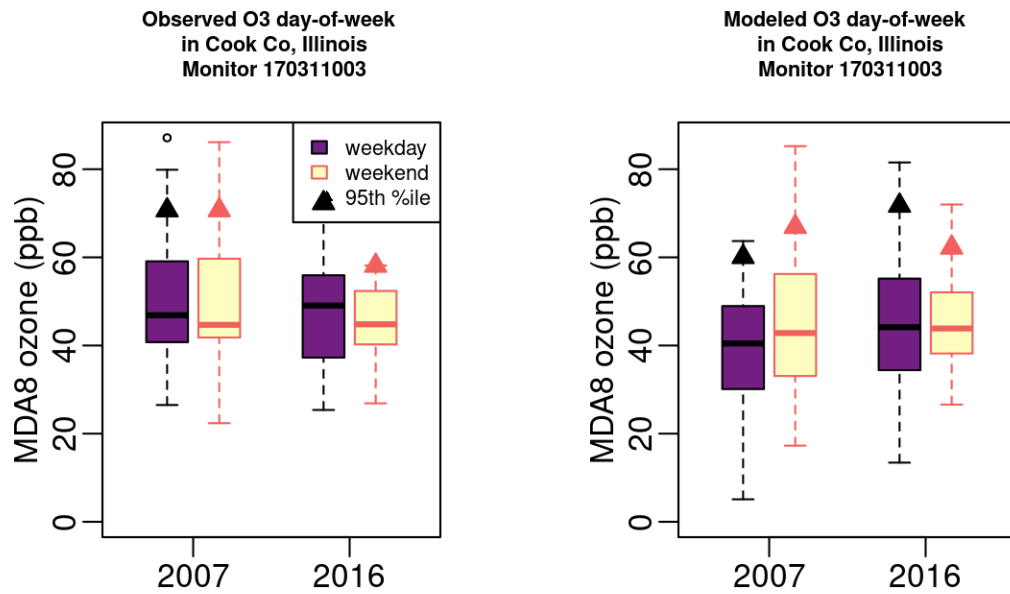

162

163 Figure S7. May-September weekday versus weekend MDA8 O<sub>3</sub> concentrations at the monitor  
 164 located southeast of O'Hare International airport (170311003) for 2007 and 2016 based on  
 165 monitored values (left panel) and modeled values in grid cells containing monitor location (right  
 166 panel). Boxes represent the 25th-75th percentile, horizontal lines represent median values,  
 167 whiskers extend to  $1.5 \times$  the interquartile range, dots show outlier values and triangles represent  
 168 95th percentile values. Boxplot pairs that have statistically different distributions on weekends  
 169 versus weekdays are outlined in bold.

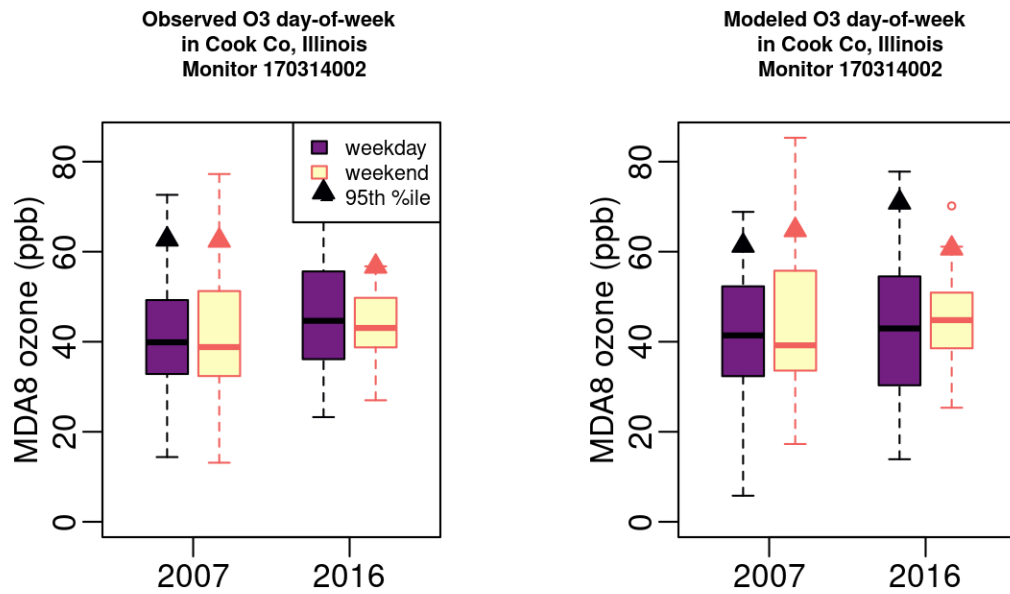

170

171 Figure S8. May-September weekday versus weekend MDA8 O3 at the Cicero, IL monitor  
 172 (170314002) for 2007 and 2016 based on monitored values (left panel) and modeled values in  
 173 grid cells containing monitor location (right panel). Boxes represent the 25th-75th percentile,  
 174 horizontal lines represent median values, whiskers extend to  $1.5 \times$  the interquartile range, dots  
 175 show outlier values and triangles represent 95th percentile values. Boxplot pairs that have  
 176 statistically different distributions on weekends versus weekdays are outlined in bold.

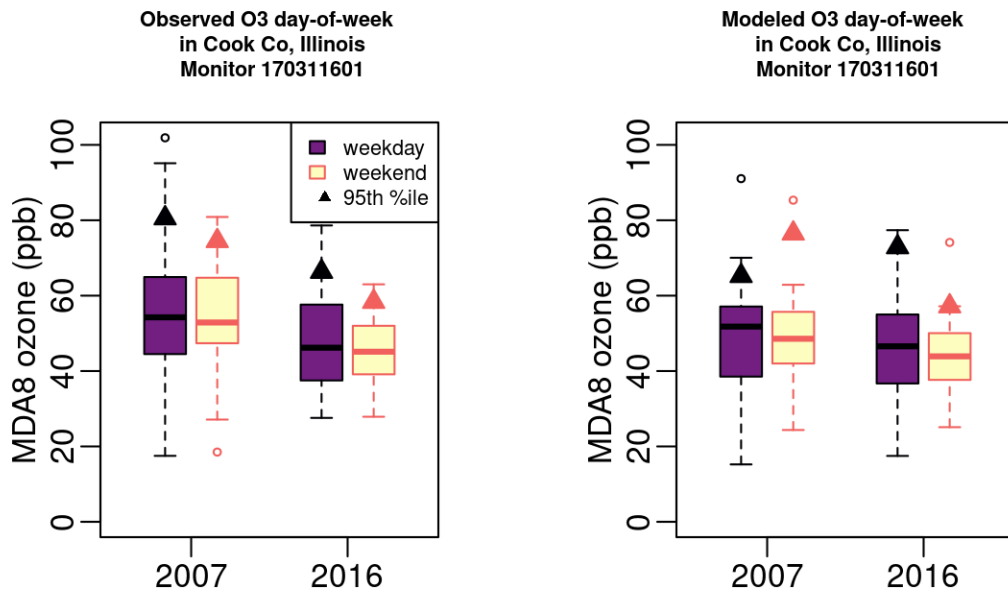

177

178 Figure S9. May-September weekday versus weekend MDA8 O3 at the Lemont, IL monitor  
 179 (170311601) for 2007 and 2016 based on monitored values (left panel) and modeled values in  
 180 grid cells containing monitor location (right panel). Boxes represent the 25th-75th percentile,  
 181 horizontal lines represent median values, whiskers extend to  $1.5 \times$  the interquartile range, dots  
 182 show outlier values and triangles represent 95th percentile values. Boxplot pairs that have  
 183 statistically different distributions on weekends versus weekdays are outlined in bold.

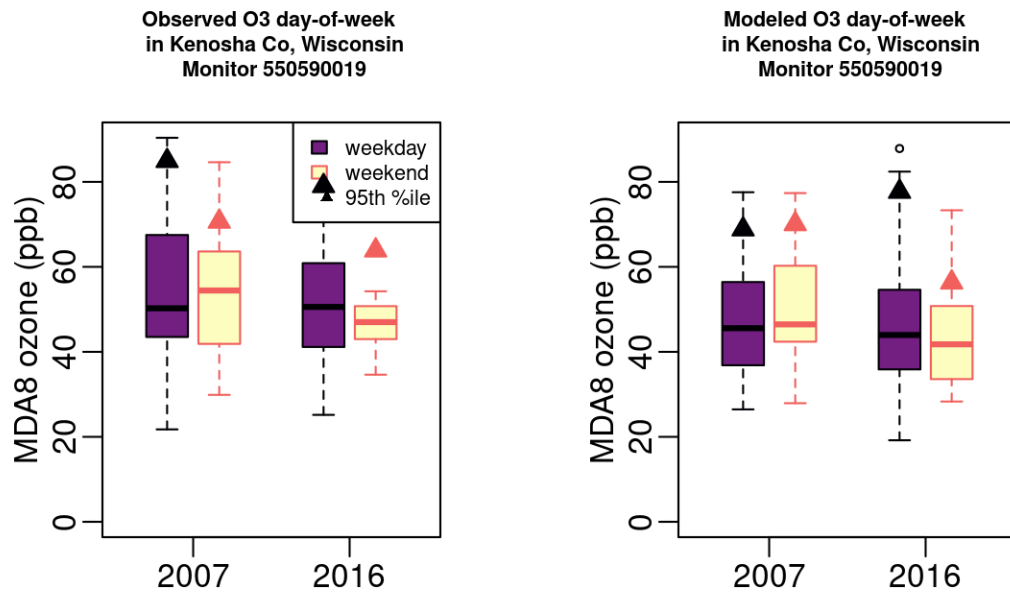

184

185 Figure S10. May-September weekday versus weekend MDA8 O3 at the Kenosha, WI monitor  
 186 (550590019) for 2007 and 2016 based on monitored values (left panel) and modeled values in  
 187 grid cells containing monitor location (right panel). Boxes represent the 25th-75th percentile,  
 188 horizontal lines represent median values, whiskers extend to  $1.5 \times$  the interquartile range, dots  
 189 show outlier values and triangles represent 95th percentile values. Boxplot pairs that have  
 190 statistically different distributions on weekends versus weekdays are outlined in bold.

191

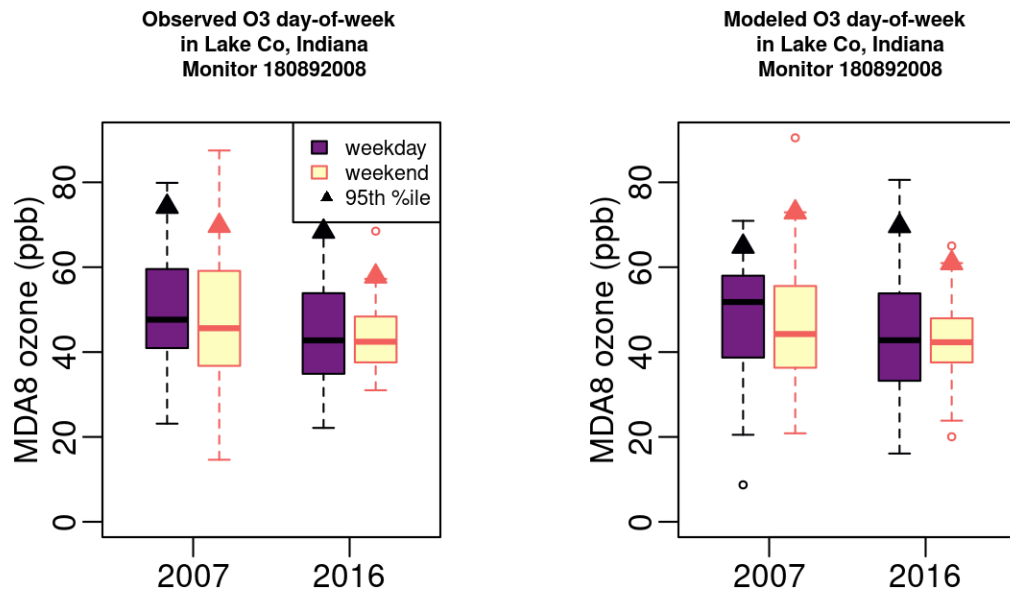

192

193 Figure S11. May-September weekday versus weekend MDA8 O<sub>3</sub> at the Hammond, IN monitor  
 194 (180892008) for 2007 and 2016 based on monitored values (left panel) and modeled values in  
 195 grid cells containing monitor location (right panel). Boxes represent the 25th-75th percentile,  
 196 horizontal lines represent median values, whiskers extend to  $1.5 \times$  the interquartile range, dots  
 197 show outlier values and triangles represent 95th percentile values. Boxplot pairs that have  
 198 statistically different distributions on weekends versus weekdays are outlined in bold.

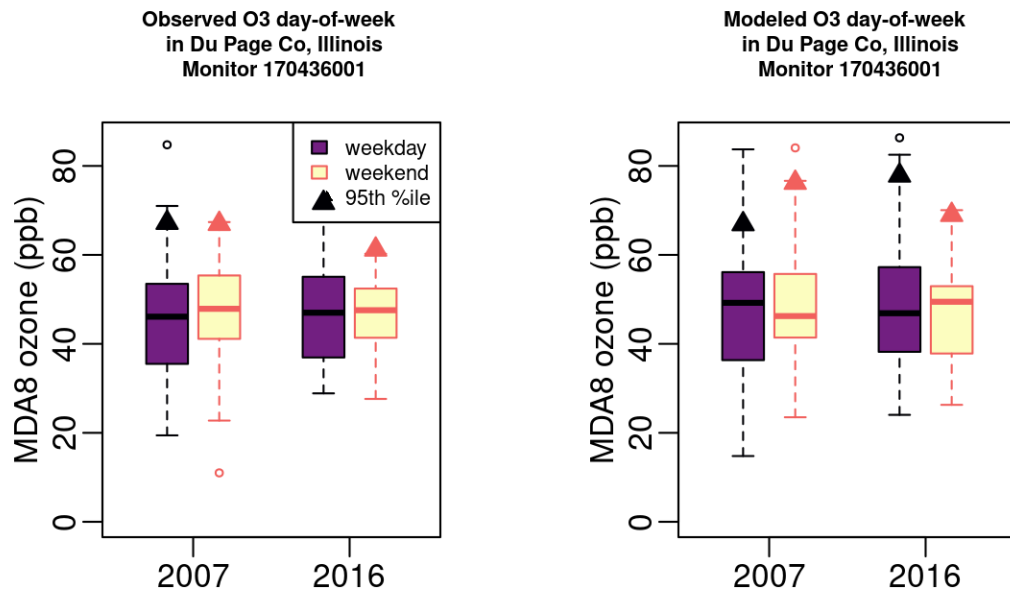

199

200 Figure S12. May-September weekday versus weekend MDA8 O<sub>3</sub> at the Morton Arboretum  
 201 monitor (170436001) for 2007 and 2016 based on monitored values (left panel) and modeled  
 202 values in grid cells containing monitor location (right panel). Boxes represent the 25th-75th  
 203 percentile, horizontal lines represent median values, whiskers extend to  $1.5 \times$  the interquartile  
 204 range, dots show outlier values and triangles represent 95th percentile values. Boxplot pairs that  
 205 have statistically different distributions on weekends versus weekdays are outlined in bold.

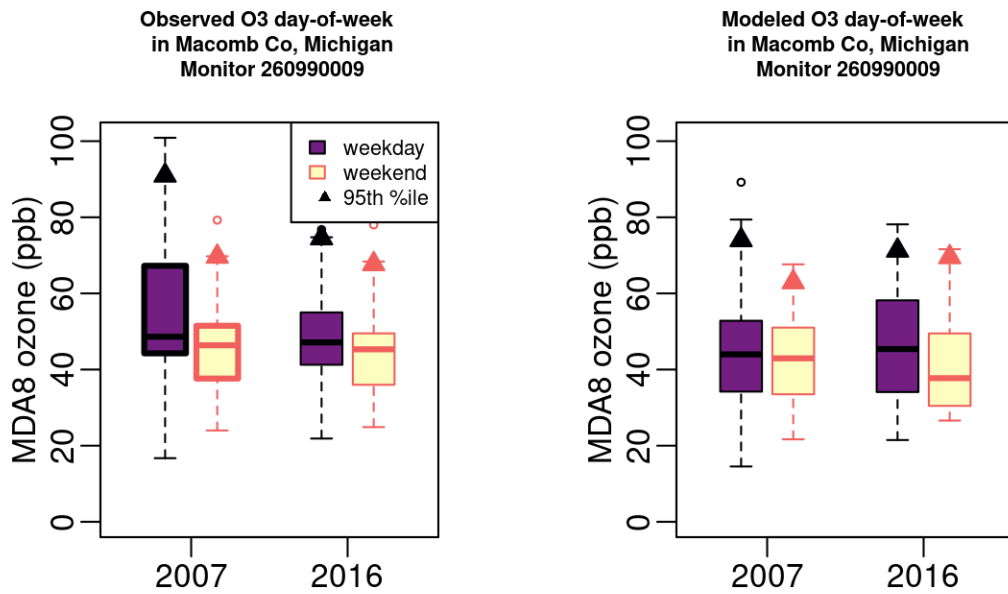

206

207

208 Figure S13. May-September weekday versus weekend MDA8 O3 at the New Haven monitor  
 209 (260990009) for 2007 and 2016 based on monitored values (left panel) and modeled values in  
 210 grid cells containing monitor location (right panel). Boxes represent the 25th-75th percentile,  
 211 horizontal lines represent median values, whiskers extend to  $1.5 \times$  the interquartile range, dots  
 212 show outlier values and triangles represent 95th percentile values. Boxplot pairs that have  
 213 statistically different distributions on weekends versus weekdays are outlined in bold.

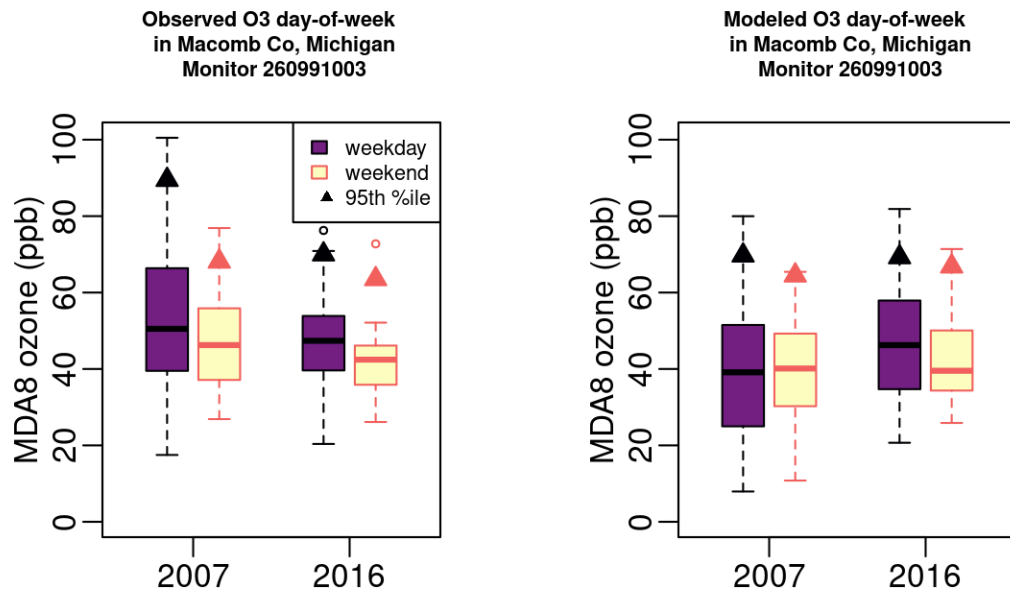

214

215 Figure S14. May-September weekday versus weekend MDA8 O<sub>3</sub> at the Warren, MI monitor  
 216 (260991003) for 2007 and 2016 based on monitored values (left panel) and modeled values in  
 217 grid cells containing monitor location (right panel). Boxes represent the 25th-75th percentile,  
 218 horizontal lines represent median values, whiskers extend to  $1.5 \times$  the interquartile range, dots  
 219 show outlier values and triangles represent 95th percentile values. Boxplot pairs that have  
 220 statistically different distributions on weekends versus weekdays are outlined in bold.



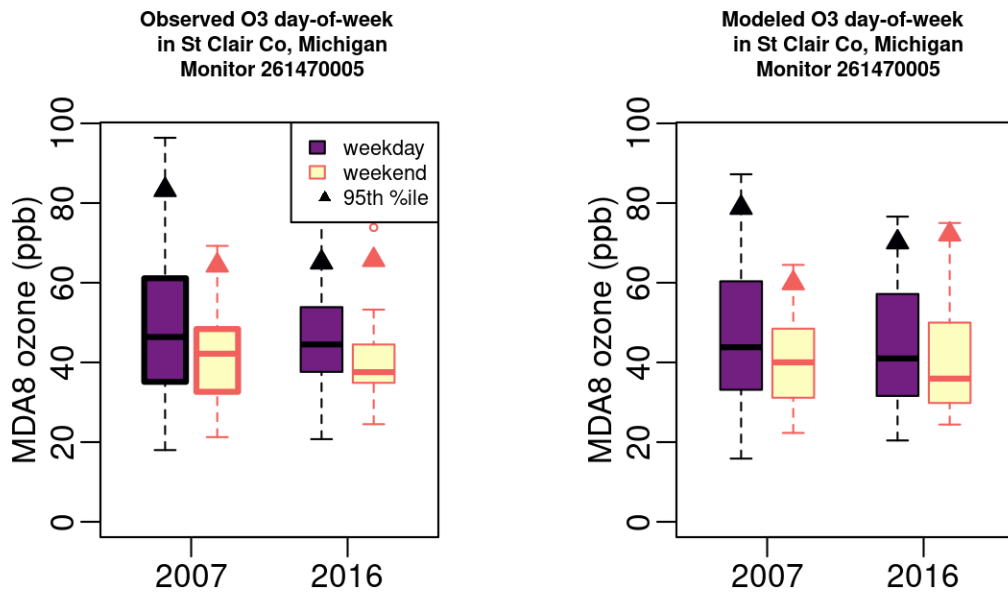

221

222 Figure S15. May-September weekday versus weekend MDA8 O<sub>3</sub> at the Port Huron monitor  
 223 (261470005) for 2007 and 2016 based on monitored values (left panel) and modeled values in  
 224 grid cells containing monitor location (right panel). Boxes represent the 25th-75th percentile,  
 225 horizontal lines represent median values, whiskers extend to 1.5 × the interquartile range, dots  
 226 show outlier values and triangles represent 95th percentile values. Boxplot pairs that have  
 227 statistically different distributions on weekends versus weekdays are outlined in bold

228

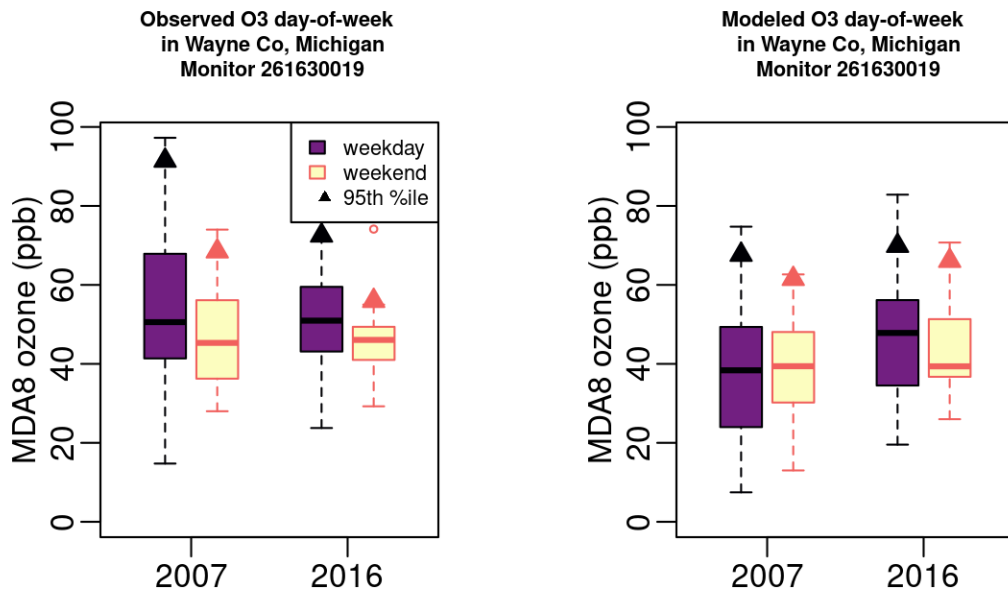

229

230 Figure S16. May-September weekday versus weekend MDA8 O<sub>3</sub> at the East 7 Mile, MI monitor  
 231 (261630019) for 2007 and 2016 based on monitored values (left panel) and modeled values in  
 232 grid cells containing monitor location (right panel). Boxes represent the 25th-75th percentile,  
 233 horizontal lines represent median values, whiskers extend to  $1.5 \times$  the interquartile range, dots  
 234 show outlier values and triangles represent 95th percentile values. Boxplot pairs that have  
 235 statistically different distributions on weekends versus weekdays are outlined in bold.

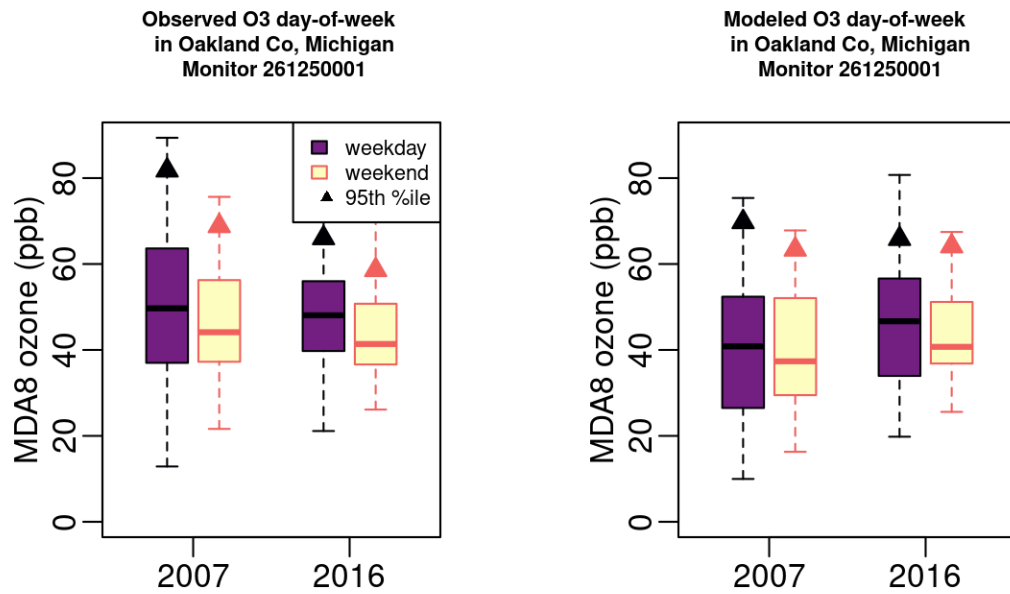

236

237 Figure S17. May-September weekday versus weekend MDA8 O3 at the Oak Park, MI monitor  
 238 (261250001) for 2007 and 2016 based on monitored values (left panel) and modeled values in  
 239 grid cells containing monitor location (right panel). Boxes represent the 25th-75th percentile,  
 240 horizontal lines represent median values, whiskers extend to  $1.5 \times$  the interquartile range, dots  
 241 show outlier values and triangles represent 95th percentile values. Boxplot pairs that have  
 242 statistically different distributions on weekends versus weekdays are outlined in bold.

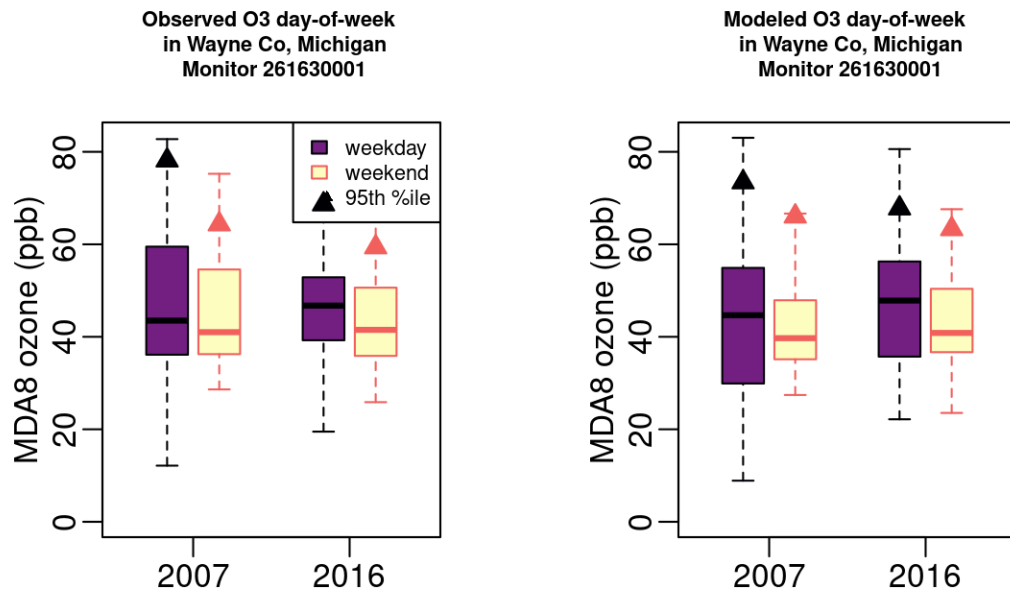

243

244 Figure S18. May-September weekday versus weekend MDA8 O<sub>3</sub> at the Allen Park, MI monitor  
 245 (261630001) for 2007 and 2016 based on monitored values (left panel) and modeled values in  
 246 grid cells containing monitor location (right panel). Boxes represent the 25th-75th percentile,  
 247 horizontal lines represent median values, whiskers extend to  $1.5 \times$  the interquartile range, dots  
 248 show outlier values and triangles represent 95th percentile values. Boxplot pairs that have  
 249 statistically different distributions on weekends versus weekdays are outlined in bold.

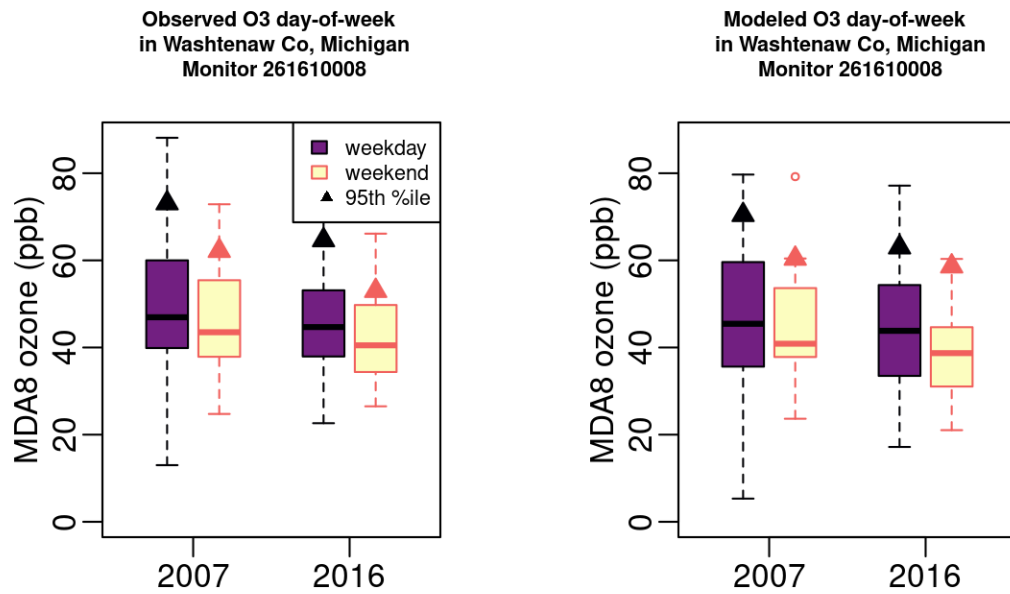

250

251 Figure S19. May-September weekday versus weekend MDA8 O<sub>3</sub> at the Ypsilanti, MI monitor  
 252 (261610008) for 2007 and 2016 based on monitored values (left panel) and modeled values in  
 253 grid cells containing monitor location (right panel). Boxes represent the 25th-75th percentile,  
 254 horizontal lines represent median values, whiskers extend to  $1.5 \times$  the interquartile range, dots  
 255 show outlier values and triangles represent 95th percentile values. Boxplot pairs that have  
 256 statistically different distributions on weekends versus weekdays are outlined in bold.

257

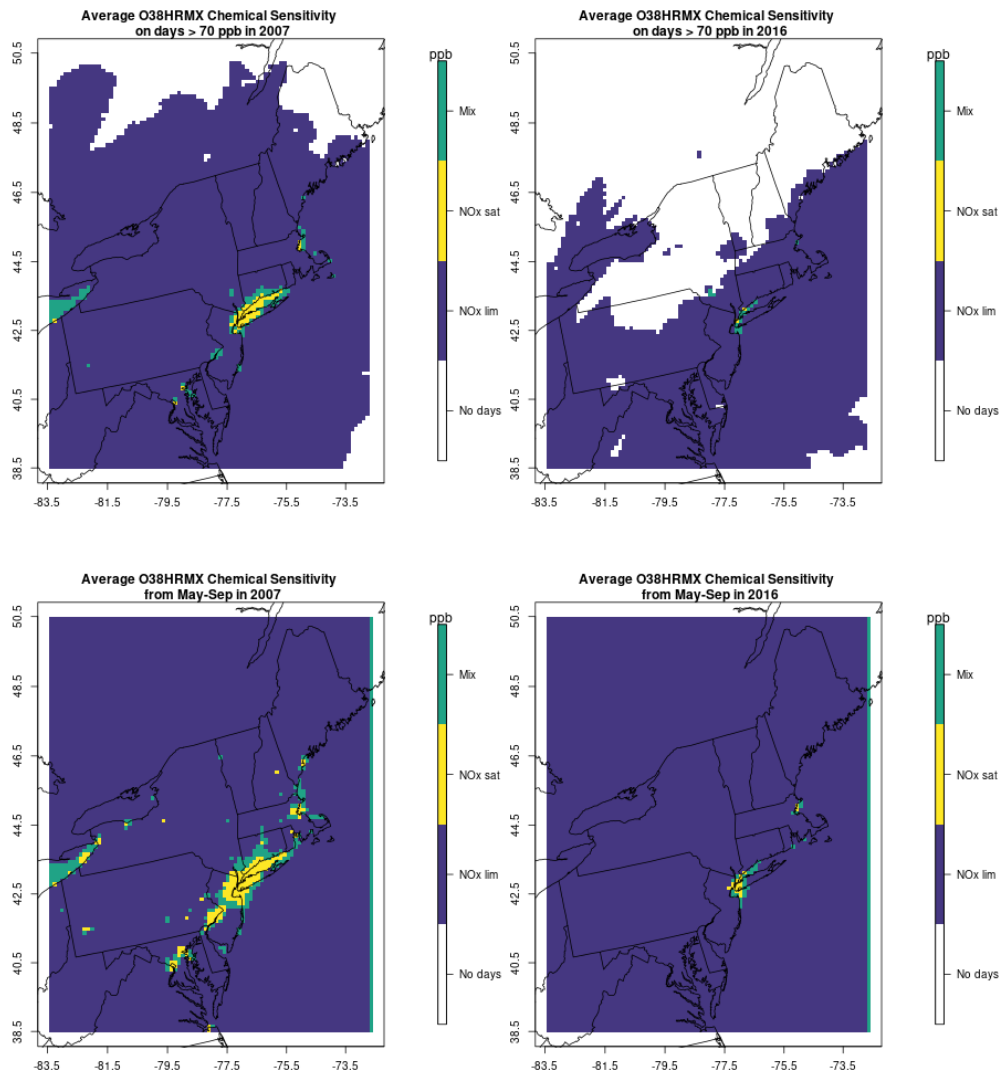

258

259 Figure S20: Northeast model-predicted average O<sub>3</sub> chemical formation regime on days with  
 260 MDA8 O<sub>3</sub> > 70 ppb (top panels) and across all May-Sep days (bottom panels) in 2007 (left  
 261 panels) and 2016 (right panels)

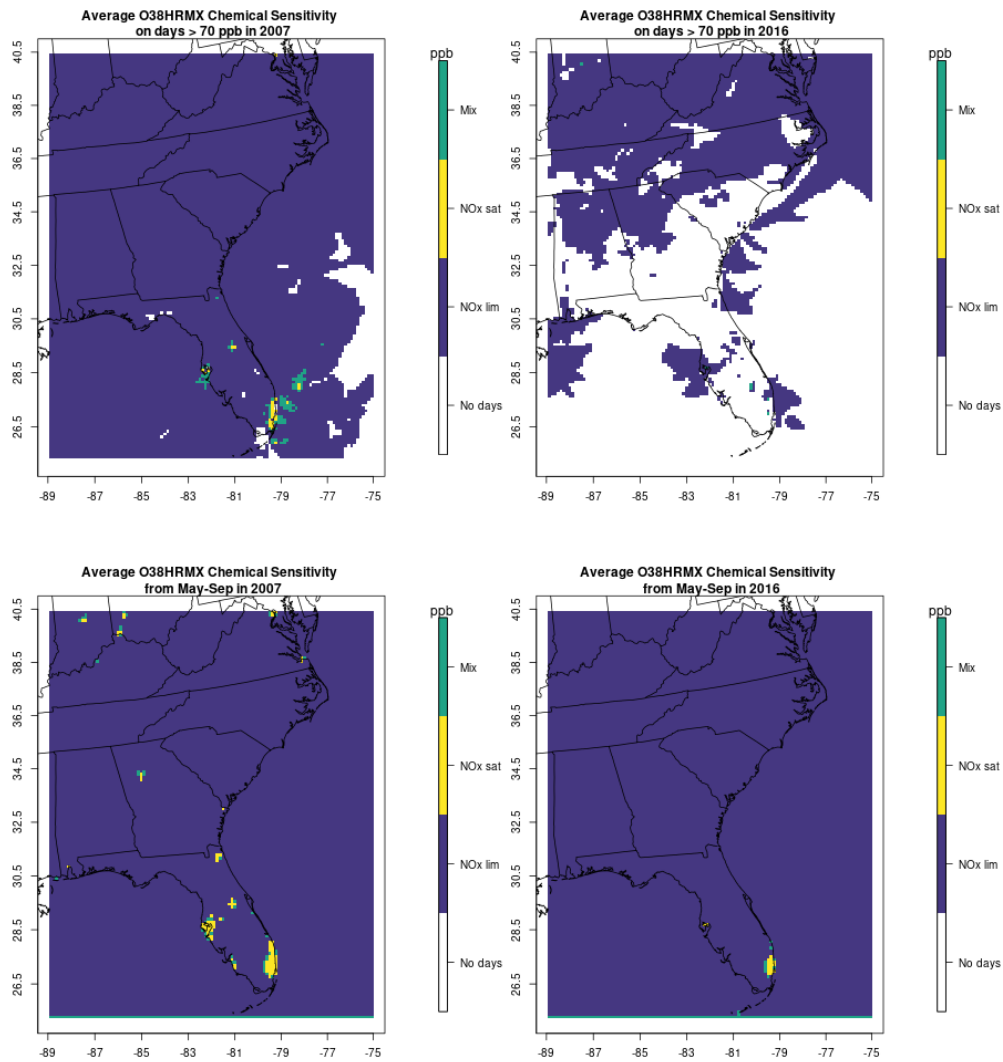

262

263 Figure S21: Southeast model-predicted average O<sub>3</sub> chemical formation regime on days with  
 264 MDA8 O<sub>3</sub> > 70 ppb (top panels) and across all May-Sep days (bottom panels) in 2007 (left  
 265 panels) and 2016 (right panels)

266

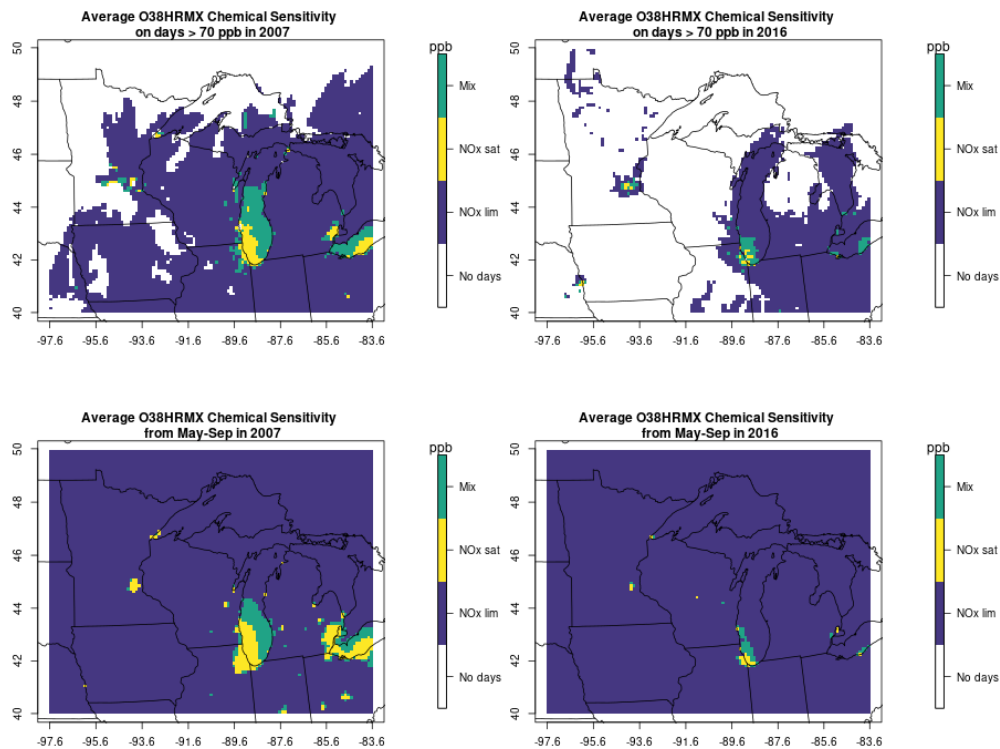

267

268 Figure S22: Upper Midwest model-predicted average O<sub>3</sub> chemical formation regime on days  
 269 with MDA8 O<sub>3</sub> > 70 ppb (top panels) and across all May-Sep days (bottom panels) in 2007 (left  
 270 panels) and 2016 (right panels)

271



272

273

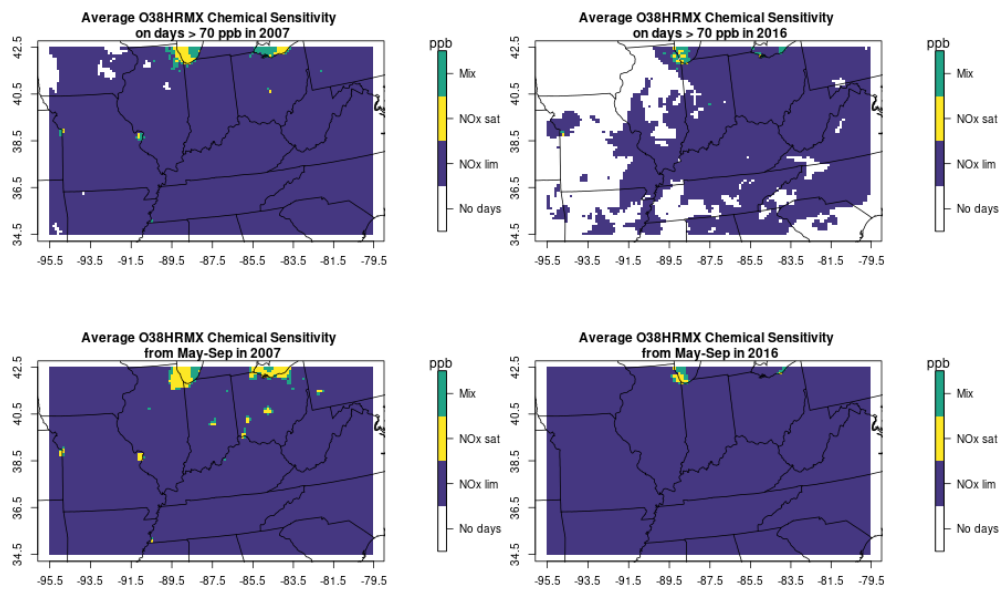

274

275 Figure S23: Ohio River Valley model-predicted average O<sub>3</sub> chemical formation regime on days  
276 with MDA8 O<sub>3</sub> > 70 ppb (top panels) and across all May-Sep days (bottom panels) in 2007 (left  
277 panels) and 2016 (right panels)

278

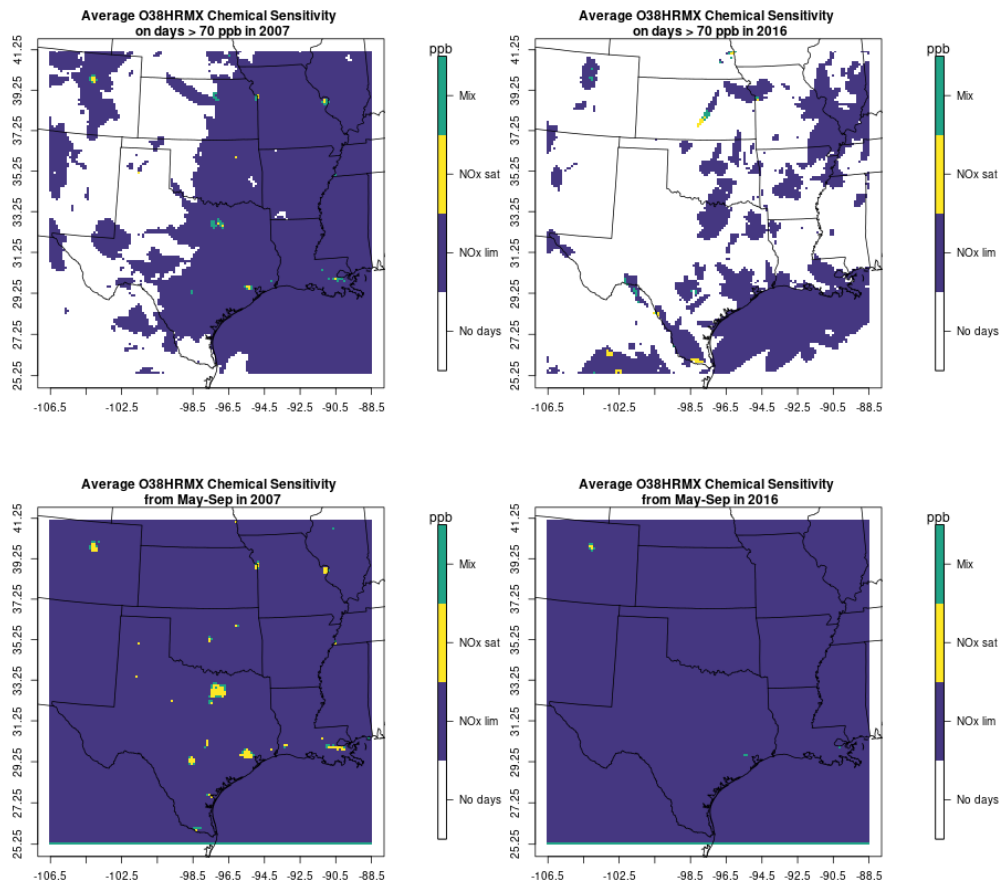

279

280 Figure S24: South model-predicted average O<sub>3</sub> chemical formation regime on days with MDA8  
 281 O<sub>3</sub> > 70 ppb (top panels) and across all May-Sep days (bottom panels) in 2007 (left panels) and  
 282 2016 (right panels)

283

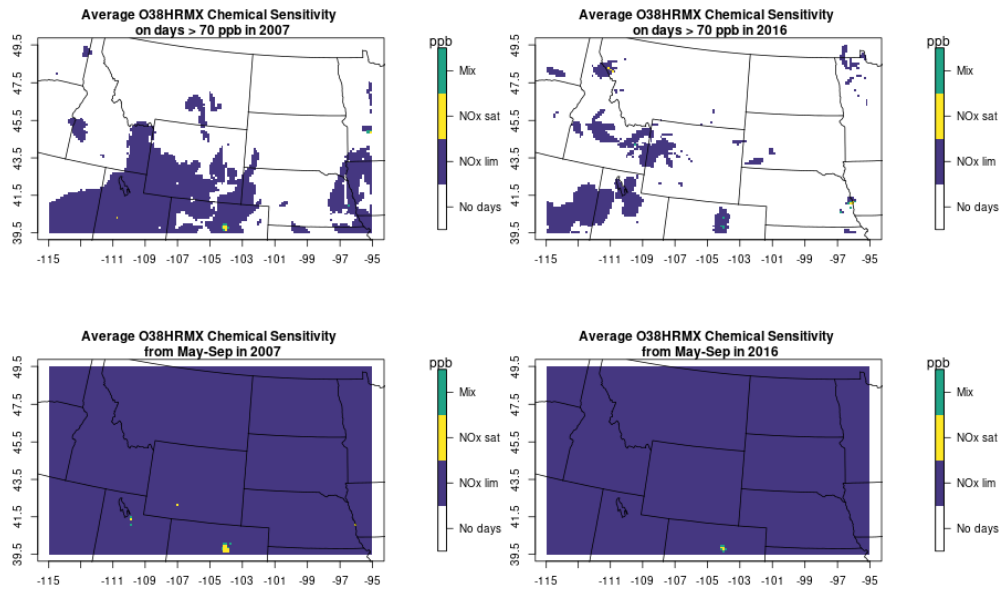

284

285 Figure S25: Northern Rockies and Plains model-predicted average O<sub>3</sub> chemical formation regime  
 286 on days with MDA8 O<sub>3</sub> > 70 ppb (top panels) and across all May-Sep days (bottom panels) in  
 287 2007 (left panels) and 2016 (right panels)

288

289

290

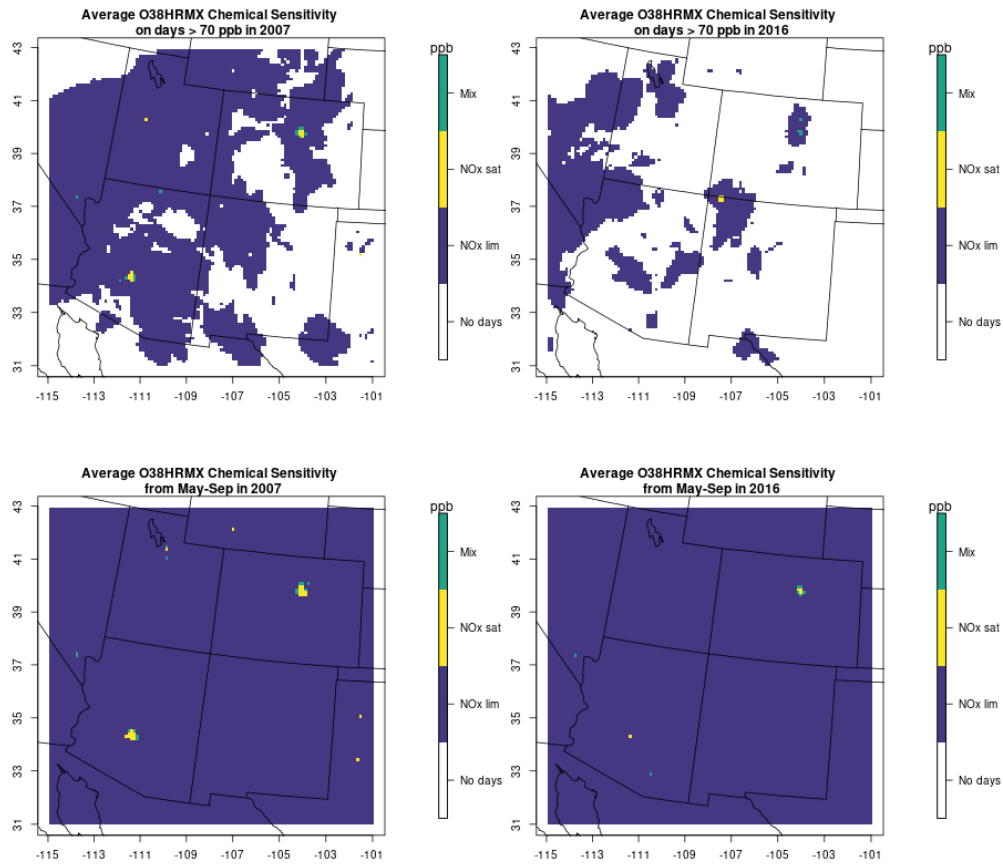

291

292

293 Figure S26: Southwest model-predicted average O<sub>3</sub> chemical formation regime on days with  
 294 MDA8 O<sub>3</sub> > 70 ppb (top panels) and across all May-Sep days (bottom panels) in 2007 (left  
 295 panels) and 2016 (right panels)

296

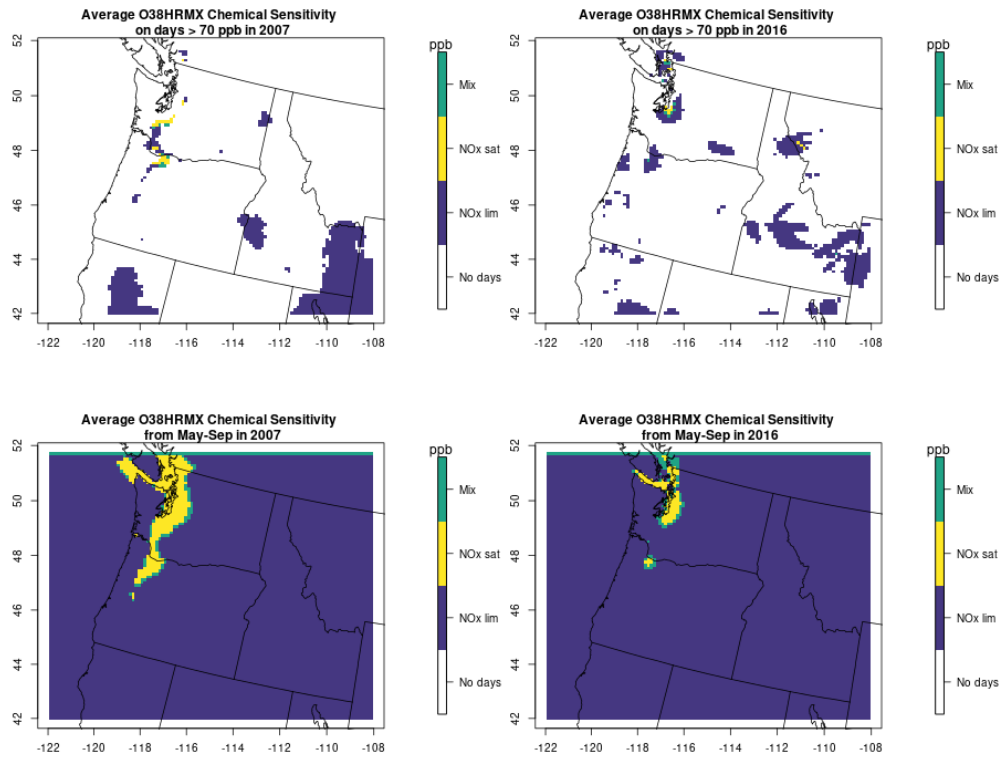

297

298 Figure S27: Northwest model-predicted average O<sub>3</sub> chemical formation regime on days with  
 299 MDA8 O<sub>3</sub> > 70 ppb (top panels) and across all May-Sep days (bottom panels) in 2007 (left  
 300 panels) and 2016 (right panels)

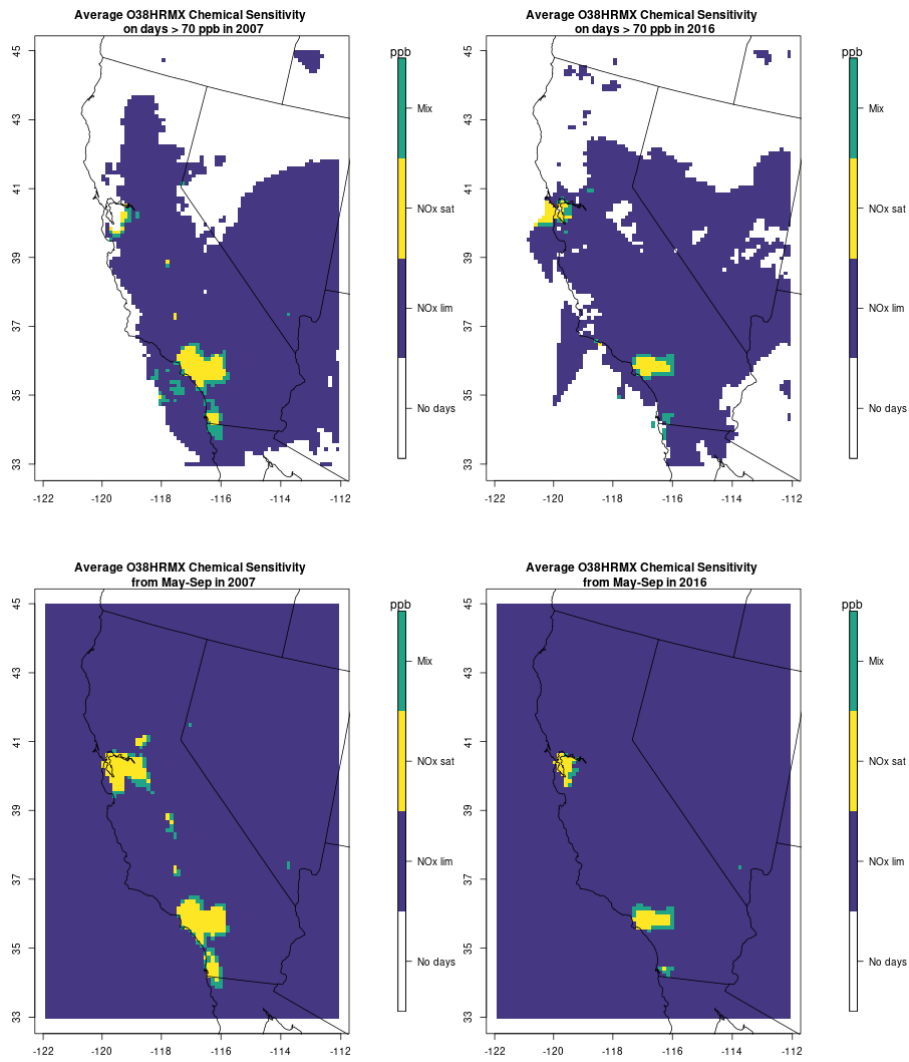

301  
 302 Figure S28: West model-predicted average O<sub>3</sub> chemical formation regime on days with MDA8  
 303 O<sub>3</sub> > 70 ppb (top panels) and across all May-Sep days (bottom panels) in 2007 (left panels) and  
 304 2016 (right panels)

305

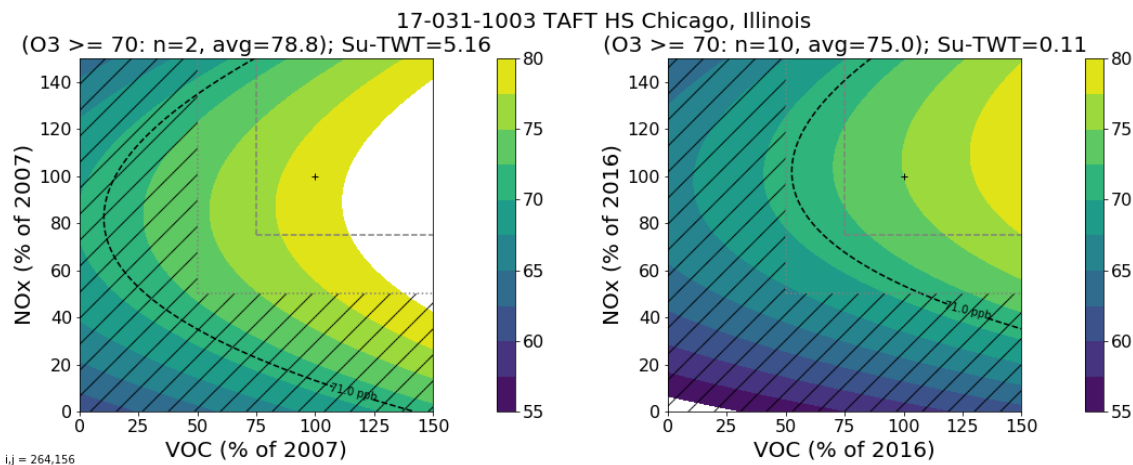

306

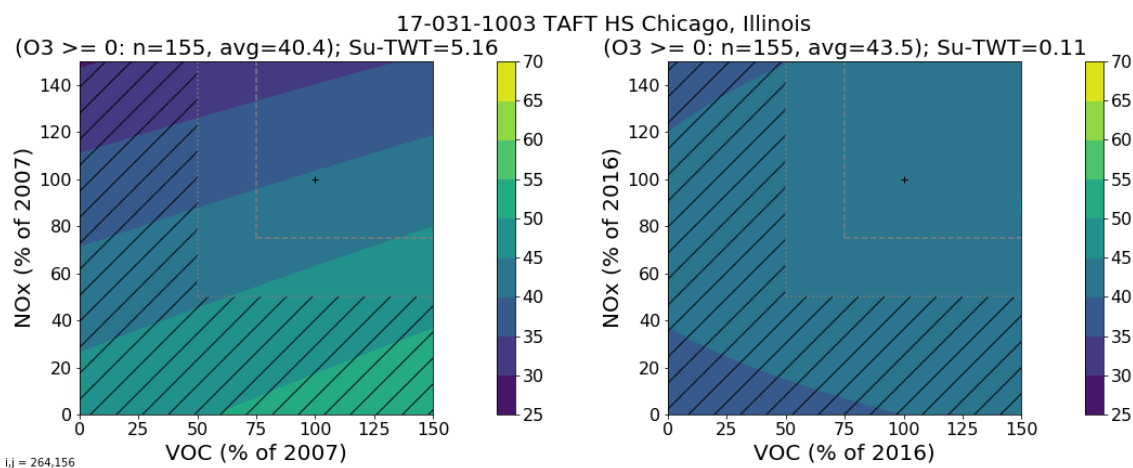

307 Figure S29. Ozone isopleth diagrams in 2007 (left) and 2016 (right) for all MDA8 (O<sub>3</sub>>0)  
308 (bottom) and high MDA8 (O<sub>3</sub>>70) (top) for the monitor located southeast of O’Hare  
309 International airport. Dashed lines are shown at 50% and 75% of original emissions, and  
310 hatching covers the area where large emission reductions (of 50-100%) are outside the domain of  
311 expected HDDM accuracy. The dotted curved line depicts locations in the Ozone isopleth space  
312 that match 71 ppb MDA8 O<sub>3</sub>, below which the site would not be modeling exceedances of the  
313 2015 ozone NAAQS.

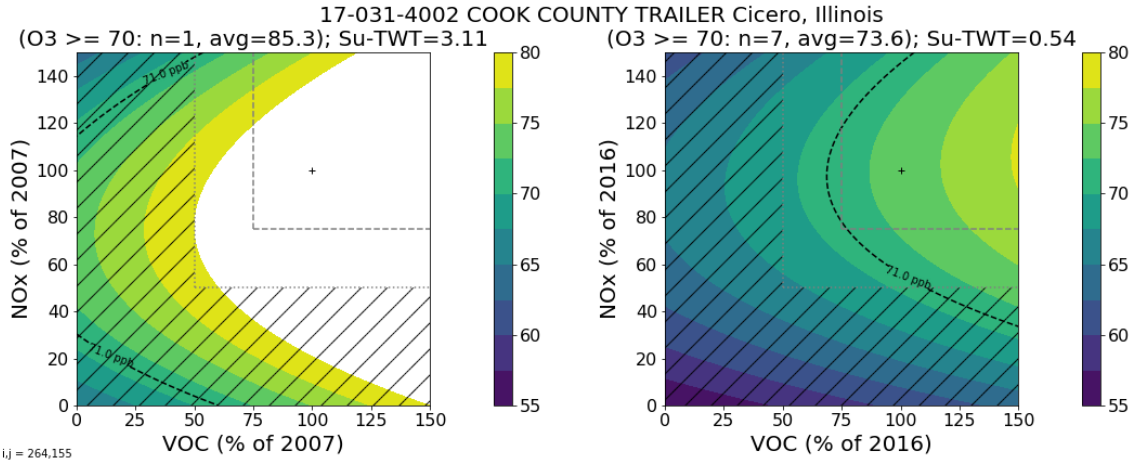

314

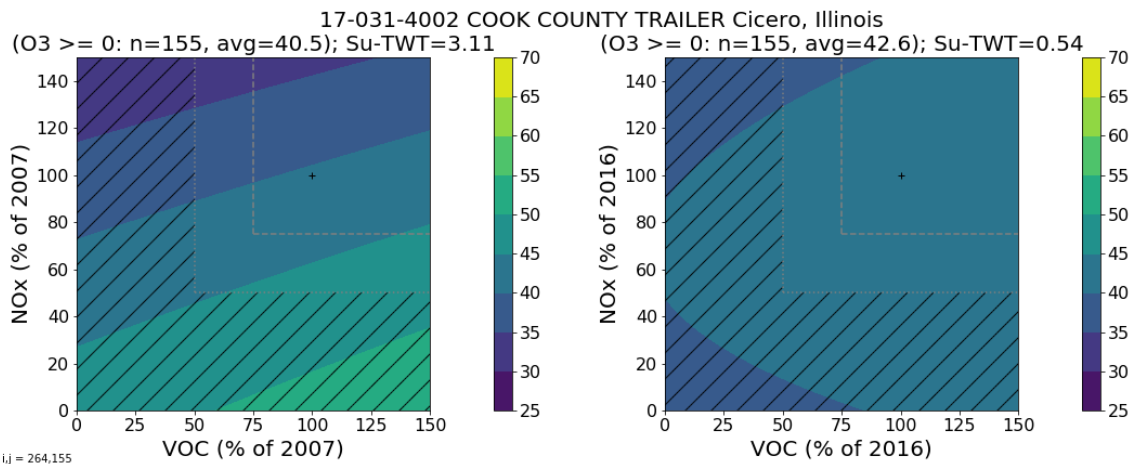

315

316 Figure S30. Ozone isopleth diagrams in 2007 (left) and 2016 (right) for all MDA8 (O3>0)  
317 (bottom) and high MDA8 (O3>70) (top) for the Cicero, IL monitor. Dashed lines are shown at  
318 50% and 75% of original emissions, and hatching covers the area where large emission  
319 reductions (of 50-100%) are outside the domain of expected HDDM accuracy. The dotted  
320 curved line depicts locations in the Ozone isopleth space that match 71 ppb MDA8 O<sub>3</sub>, below  
321 which the site would not be modeling exceedances of the 2015 ozone NAAQS.



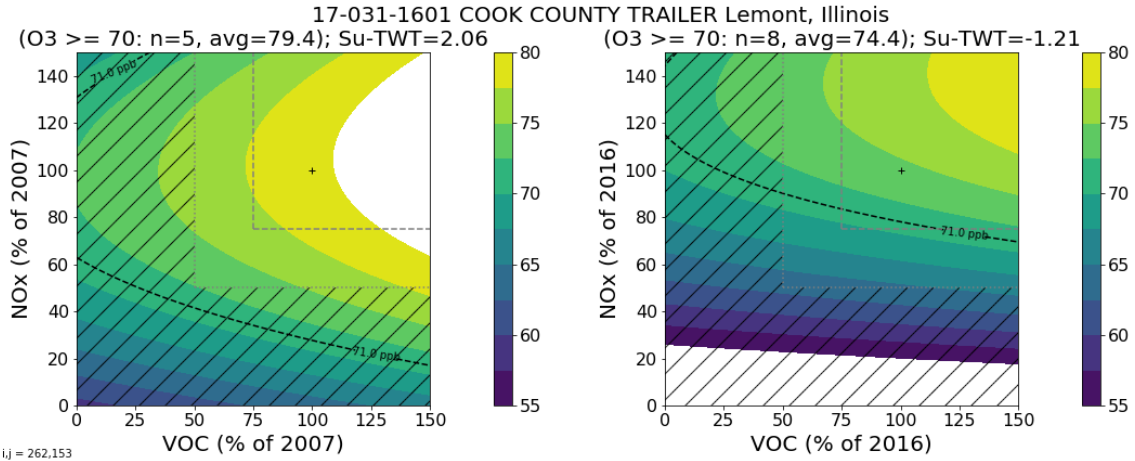

322

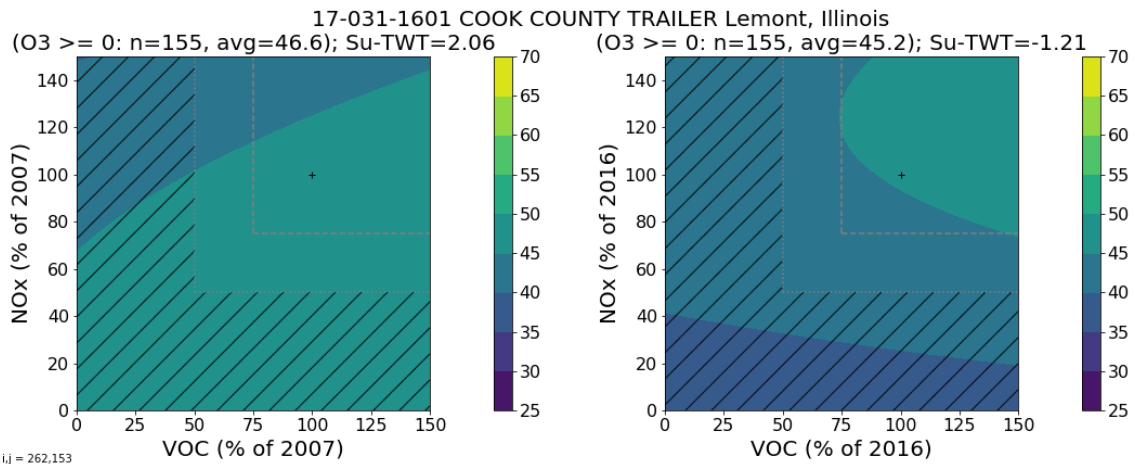

323

324 Figure S31. Ozone isopleth diagrams in 2007 (left) and 2016 (right) for all MDA8 (O3>0)  
325 (bottom) and high MDA8 (O3>70) (top) for the Lemont, IL monitor. Dashed lines are shown at  
326 50% and 75% of original emissions, and hatching covers the area where large emission  
327 reductions (of 50-100%) are outside the domain of expected HDDM accuracy. The dotted  
328 curved line depicts locations in the Ozone isopleth space that match 71 ppb MDA8 O<sub>3</sub>, below  
329 which the site would not be modeling exceedances of the 2015 ozone NAAQS.

330

331

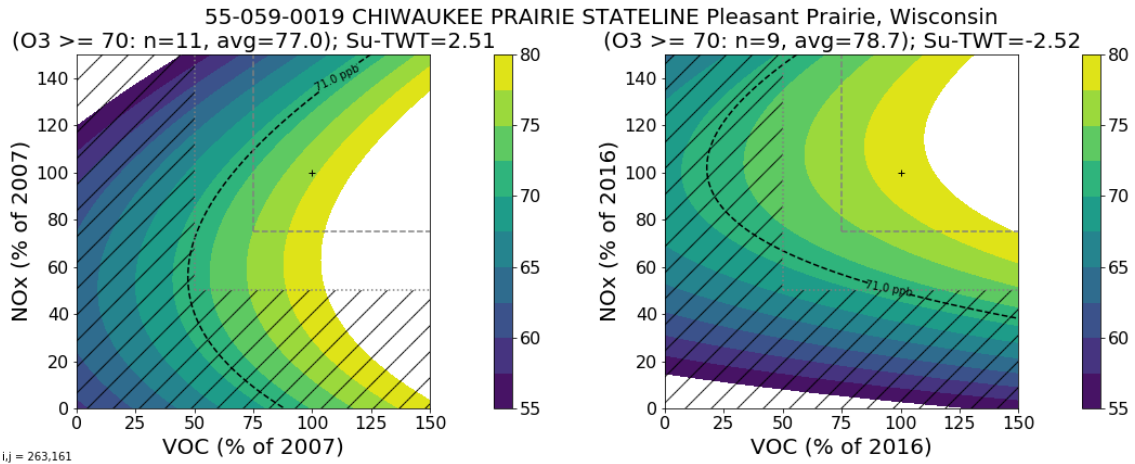

332

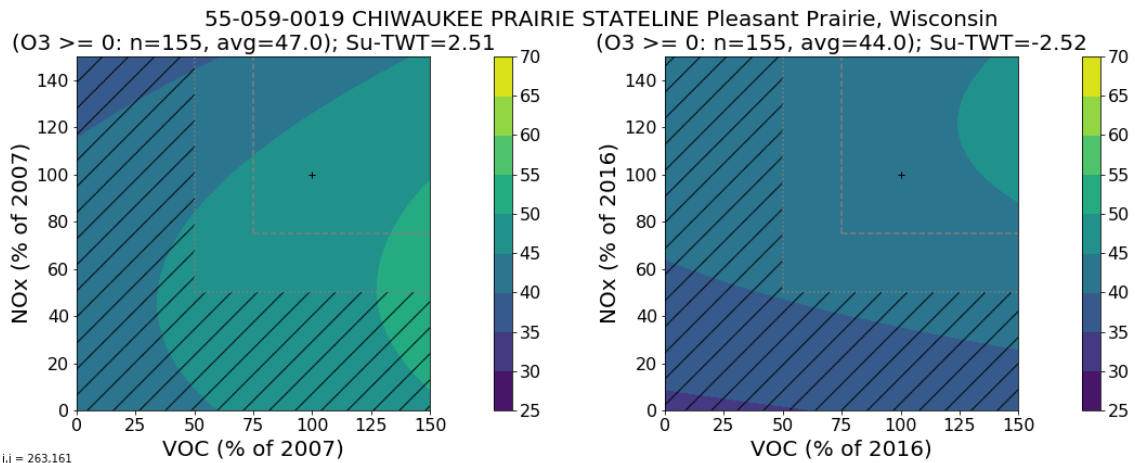

333

334 Figure S32. Ozone isopleth diagrams in 2007 (left) and 2016 (right) for all MDA8 ( $O_3 > 0$ )  
335 (bottom) and high MDA8 ( $O_3 > 70$ ) (top) for the Kenosha, WI monitor. Dashed lines are shown  
336 at 50% and 75% of original emissions, and hatching covers the area where large emission  
337 reductions (of 50-100%) are outside the domain of expected HDDM accuracy. The dotted  
338 curved line depicts locations in the Ozone isopleth space that match 71 ppb MDA8  $O_3$ , below  
339 which the site would not be modeling exceedances of the 2015 ozone NAAQS.

340

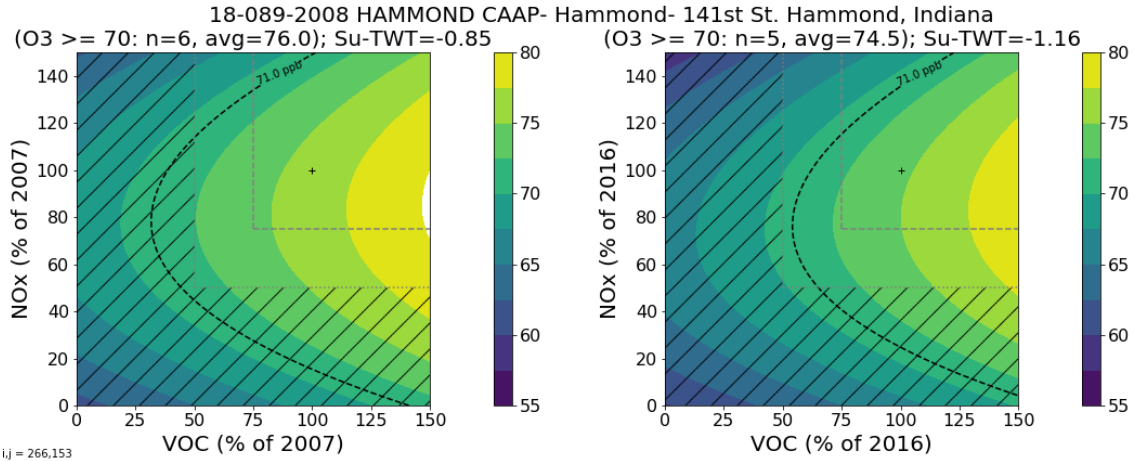

341

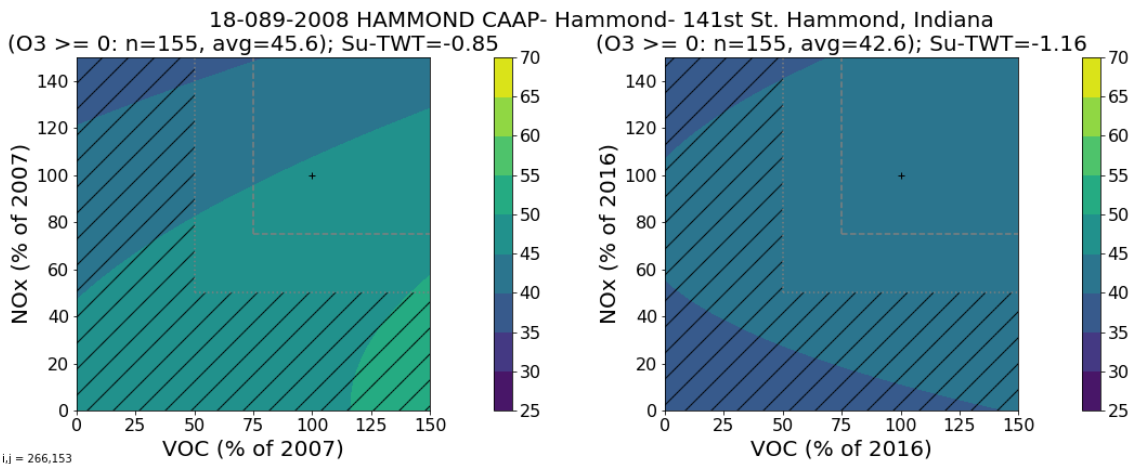

342

343 Figure S33. Ozone isopleth diagrams in 2007 (left) and 2016 (right) for all MDA8 ( $O_3 > 0$ )  
 344 (bottom) and high MDA8 ( $O_3 > 70$ ) (top) for the Hammond, IN monitor. Dashed lines are shown  
 345 at 50% and 75% of original emissions, and hatching covers the area where large emission  
 346 reductions (of 50-100%) are outside the domain of expected HDDM accuracy. The dotted  
 347 curved line depicts locations in the Ozone isopleth space that match 71 ppb MDA8  $O_3$ , below  
 348 which the site would not be modeling exceedances of the 2015 ozone NAAQS.

349

350

351

352

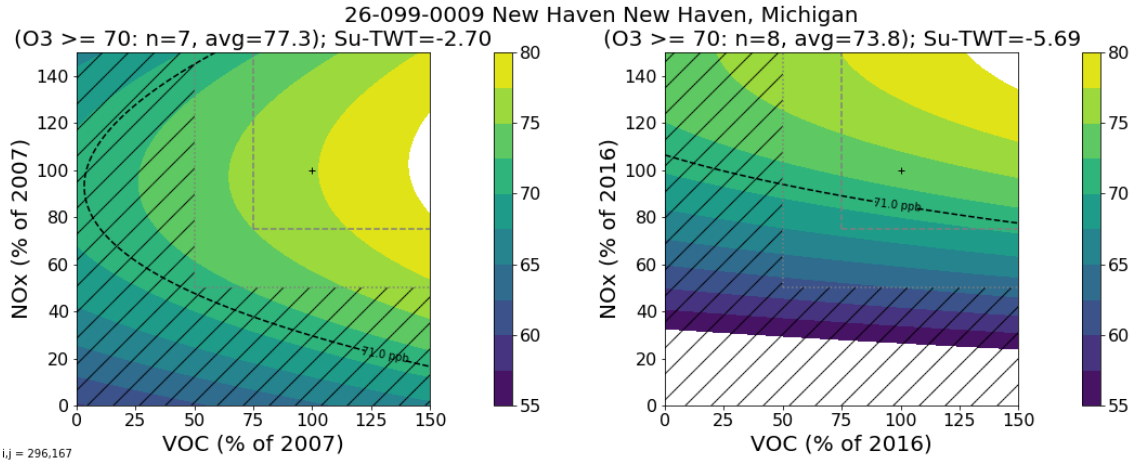

353

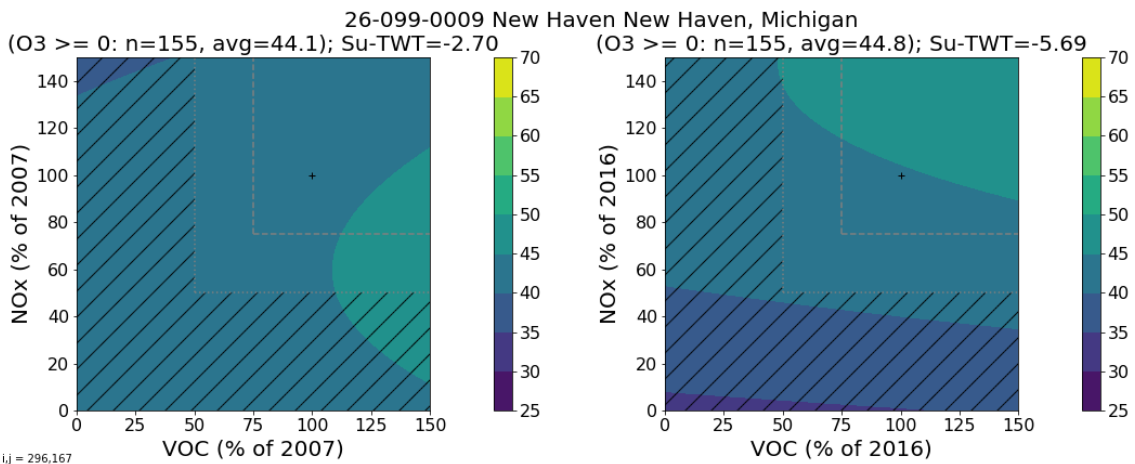

354

355 Figure S34. Ozone isopleth diagrams in 2007 (left) and 2016 (right) for all MDA8 (O3>0)  
356 (bottom) and high MDA8 (O3>70) (top) for the New Haven, MI monitor. Dashed lines are  
357 shown at 50% and 75% of original emissions, and hatching covers the area where large emission  
358 reductions (of 50-100%) are outside the domain of expected HDDM accuracy. The dotted  
359 curved line depicts locations in the Ozone isopleth space that match 71 ppb MDA8 O<sub>3</sub>, below  
360 which the site would not be modeling exceedances of the 2015 ozone NAAQS.

361

362

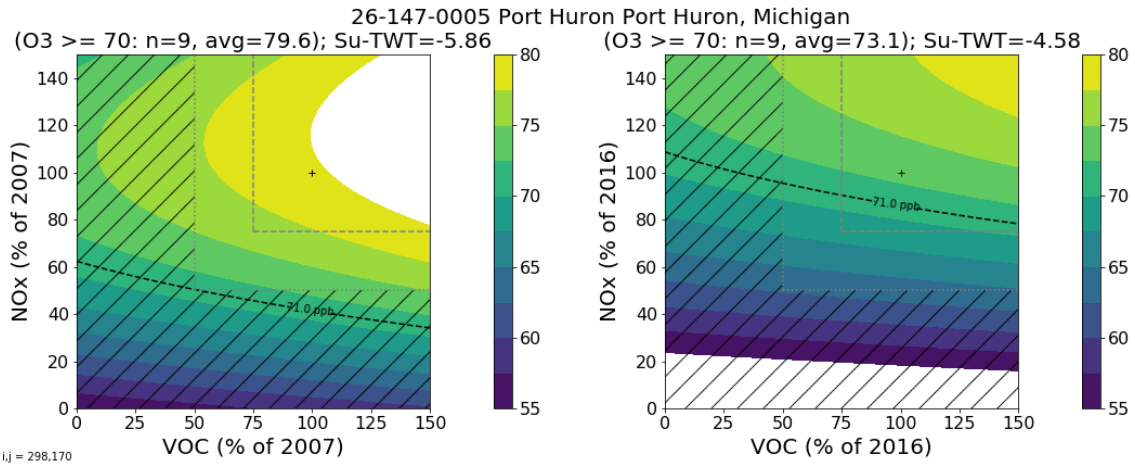

363

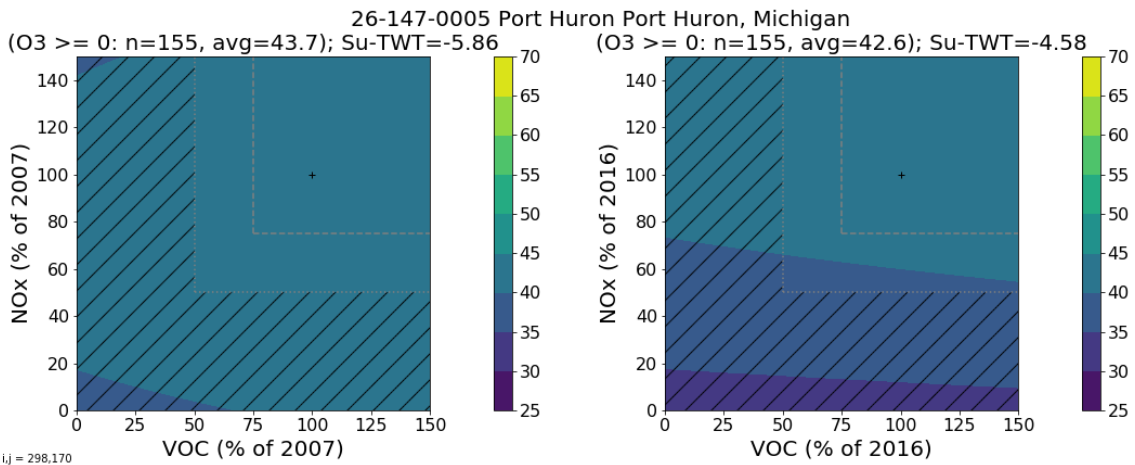

364

365 Figure S35. Ozone isopleth diagrams in 2007 (left) and 2016 (right) for all MDA8 ( $O_3 > 0$ )  
 366 (bottom) and high MDA8 ( $O_3 > 70$ ) (top) for the Port Huron, MI monitor. Dashed lines are  
 367 shown at 50% and 75% of original emissions, and hatching covers the area where large emission  
 368 reductions (of 50-100%) are outside the domain of expected HDDM accuracy. The dotted  
 369 curved line depicts locations in the Ozone isopleth space that match 71 ppb MDA8  $O_3$ , below  
 370 which the site would not be modeling exceedances of the 2015 ozone NAAQS.

371

372

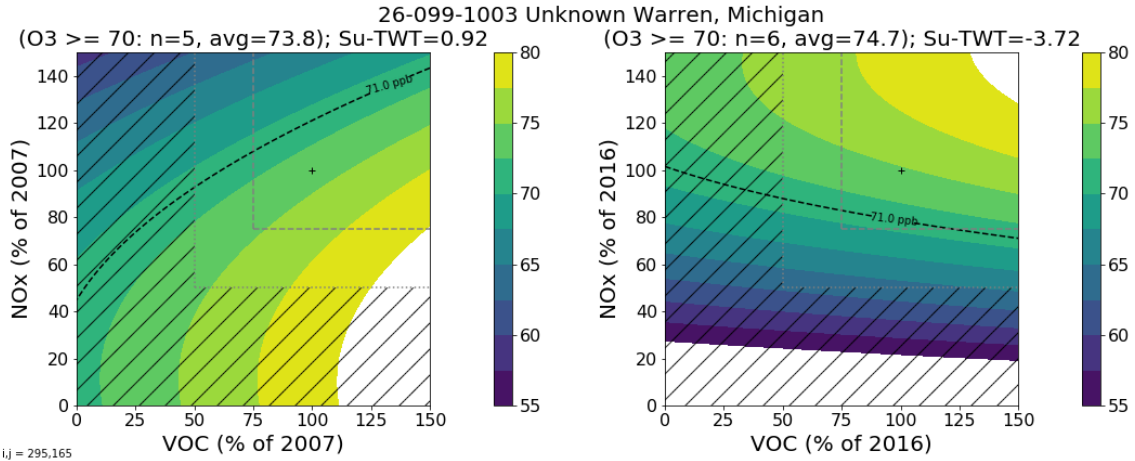

373

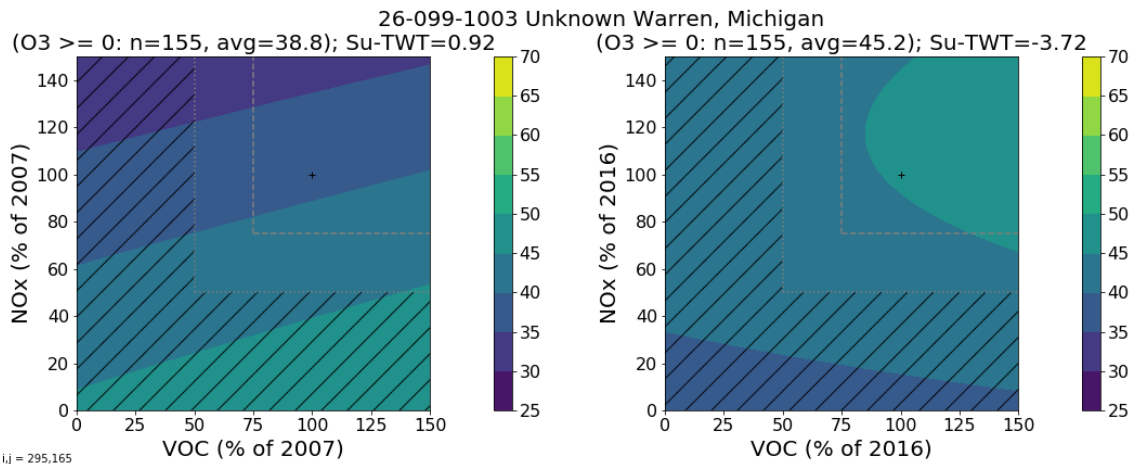

374

375

376 Figure S36. Ozone isopleth diagrams in 2007 (left) and 2016 (right) for all MDA8 ( $O_3 > 0$ )  
 377 (bottom) and high MDA8 ( $O_3 > 70$ ) (top) for the Warren, MI monitor. Dashed lines are shown at  
 378 50% and 75% of original emissions, and hatching covers the area where large emission  
 379 reductions (of 50-100%) are outside the domain of expected HDDM accuracy. The dotted  
 380 curved line depicts locations in the Ozone isopleth space that match 71 ppb MDA8  $O_3$ , below  
 381 which the site would not be modeling exceedances of the 2015 ozone NAAQS.

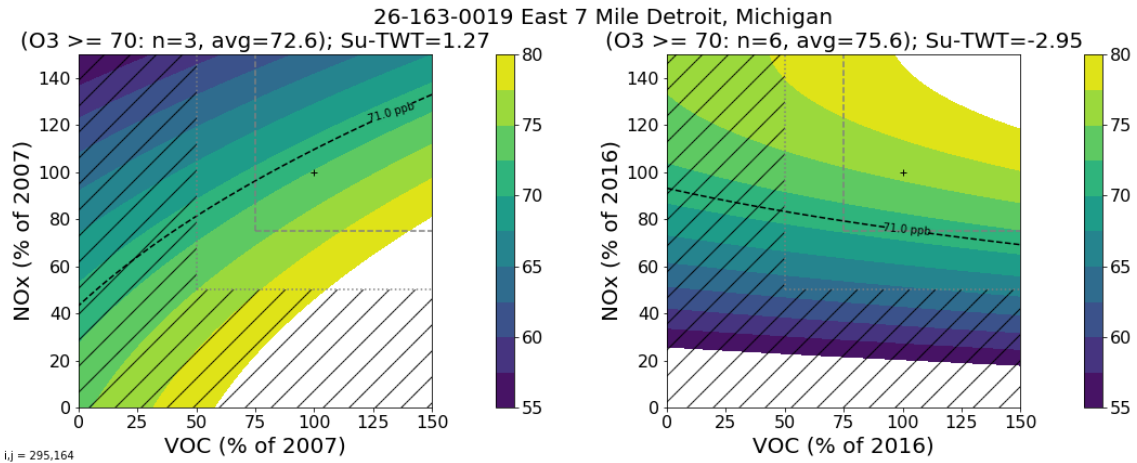

382

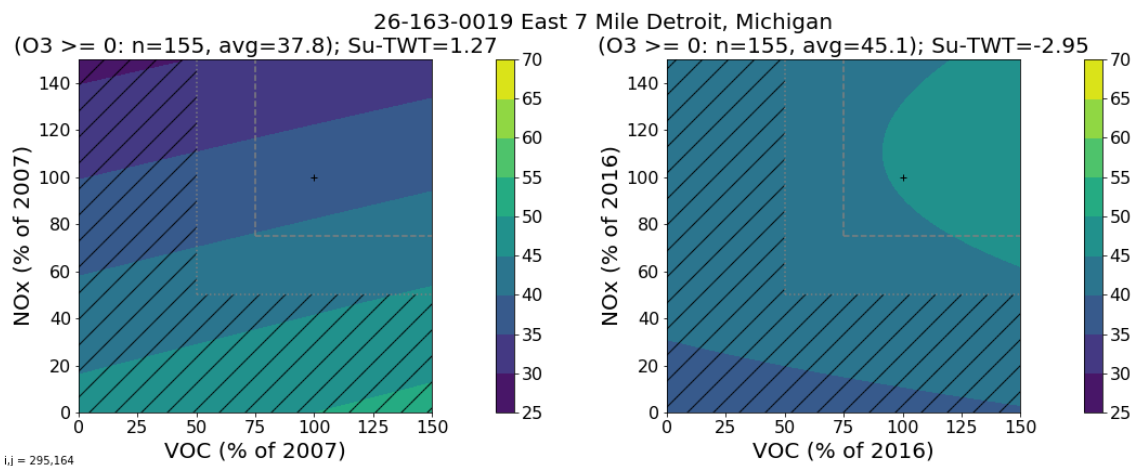

383

384 Figure S37. Ozone isopleth diagrams in 2007 (left) and 2016 (right) for all MDA8 (O3>0)  
385 (bottom) and high MDA8 (O3>70) (top) for the East 7 Mile, MI monitor. Dashed lines are  
386 shown at 50% and 75% of original emissions, and hatching covers the area where large emission  
387 reductions (of 50-100%) are outside the domain of expected HDDM accuracy. The dotted  
388 curved line depicts locations in the Ozone isopleth space that match 71 ppb MDA8 O<sub>3</sub>, below  
389 which the site would not be modeling exceedances of the 2015 ozone NAAQS.

390

391

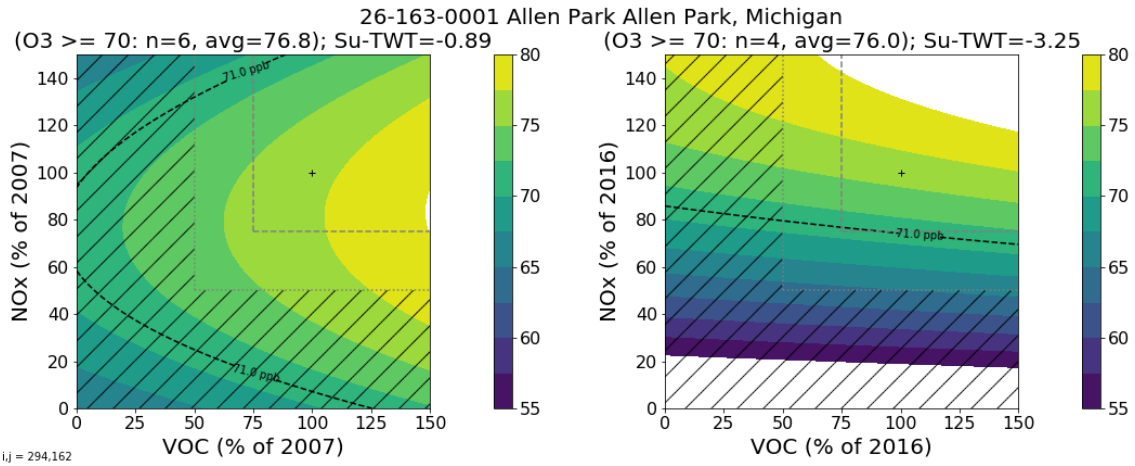

392

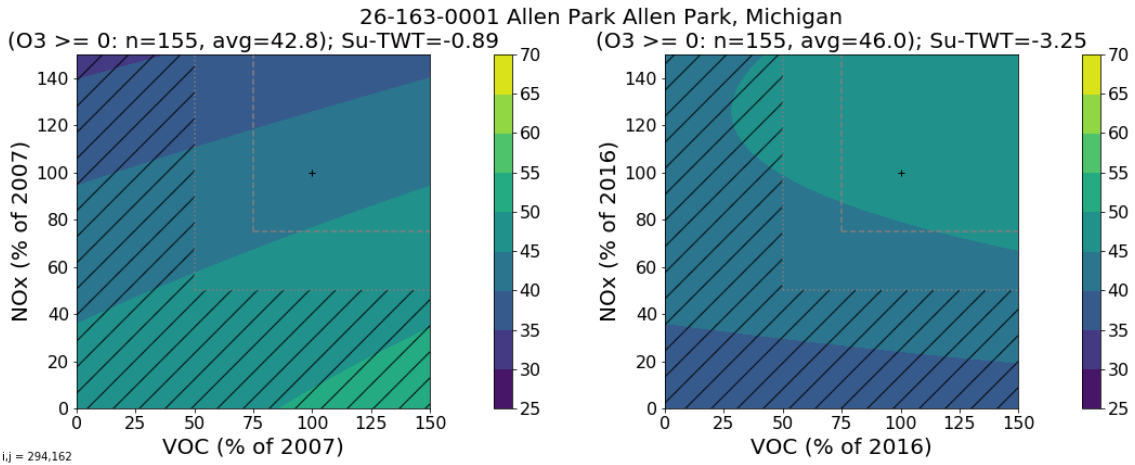

393

394

395 Figure S38. Ozone isopleth diagrams in 2007 (left) and 2016 (right) for all MDA8 (O3>0)  
396 (bottom) and high MDA8 (O3>70) (top) for the Allen Park, MI monitor. Dashed lines are  
397 shown at 50% and 75% of original emissions, and hatching covers the area where large emission  
398 reductions (of 50-100%) are outside the domain of expected HDDM accuracy. The dotted  
399 curved line depicts locations in the Ozone isopleth space that match 71 ppb MDA8 O3, below  
400 which the site would not be modeling exceedances of the 2015 ozone NAAQS.

401



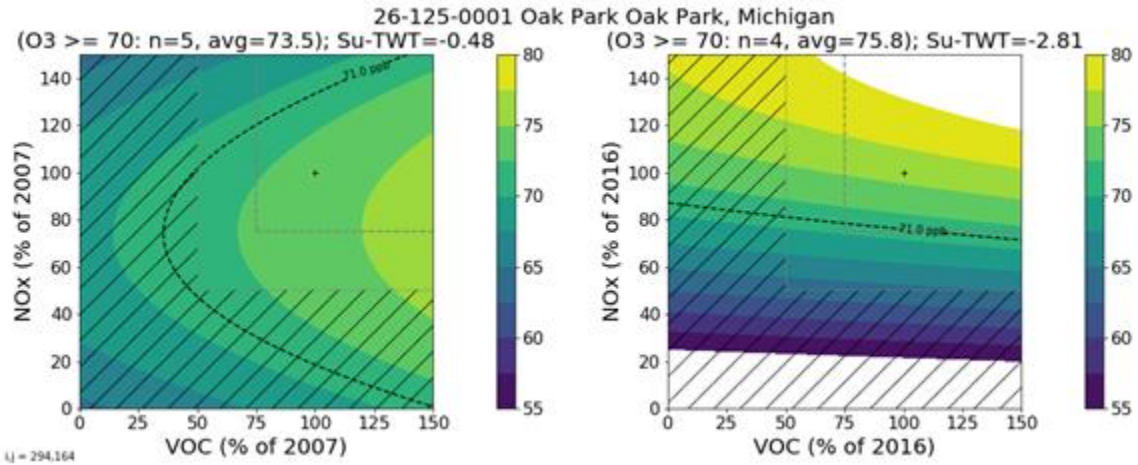

402

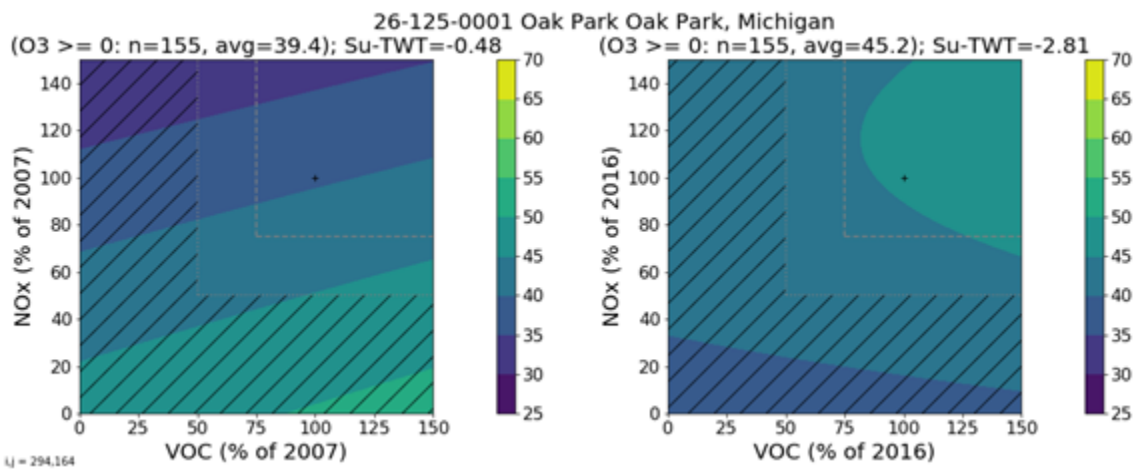

403

404

405 Figure S39. Ozone isopleth diagrams in 2007 (left) and 2016 (right) for all MDA8 ( $O_3 > 0$ )  
 406 (bottom) and high MDA8 ( $O_3 > 70$ ) (top) for the Oak Park, MI monitor. Dashed lines are shown  
 407 at 50% and 75% of original emissions, and hatching covers the area where large emission  
 408 reductions (of 50-100%) are outside the domain of expected HDDM accuracy. The dotted  
 409 curved line depicts locations in the Ozone isopleth space that match 71 ppb MDA8  $O_3$ , below  
 410 which the site would not be modeling exceedances of the 2015 ozone NAAQS.

411

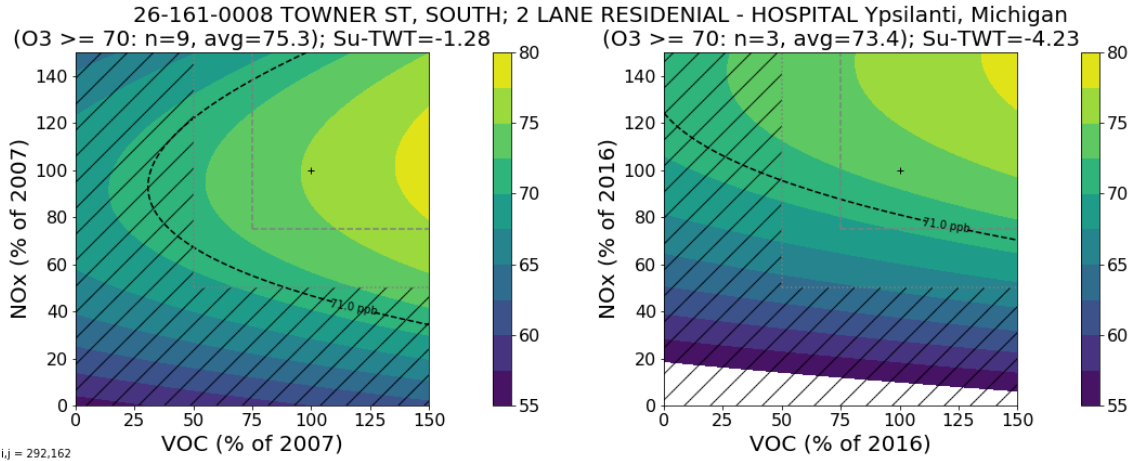

412

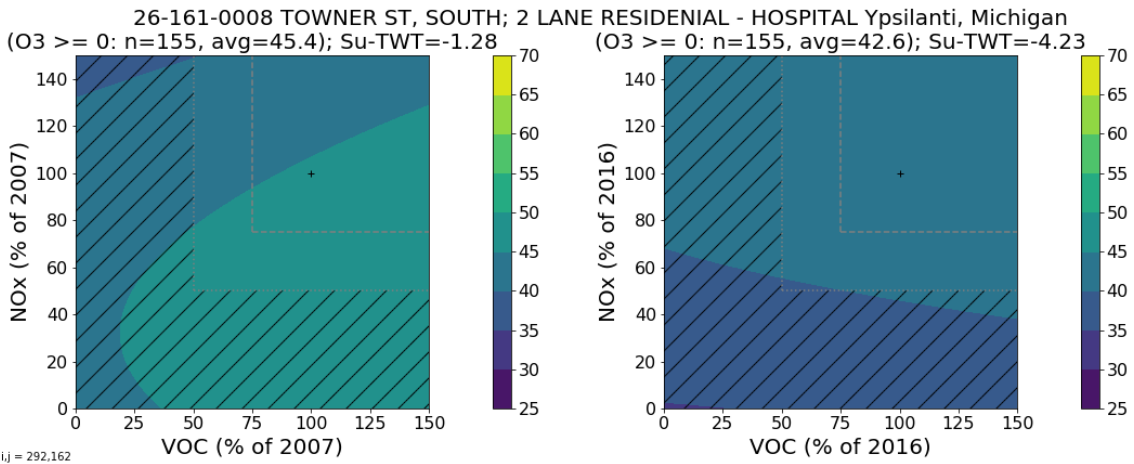

413

414 Figure S40. Ozone isopleth diagrams in 2007 (left) and 2016 (right) for all MDA8 ( $O_3 > 0$ )  
 415 (bottom) and high MDA8 ( $O_3 > 70$ ) (top) for the Ypsilanti, MI monitor. Dashed lines are shown  
 416 at 50% and 75% of original emissions, and hatching covers the area where large emission  
 417 reductions (of 50-100%) are outside the domain of expected HDDM accuracy. The dotted  
 418 curved line depicts locations in the Ozone isopleth space that match 71 ppb MDA8  $O_3$ , below  
 419 which the site would not be modeling exceedances of the 2015 ozone NAAQS.

420

421  
422

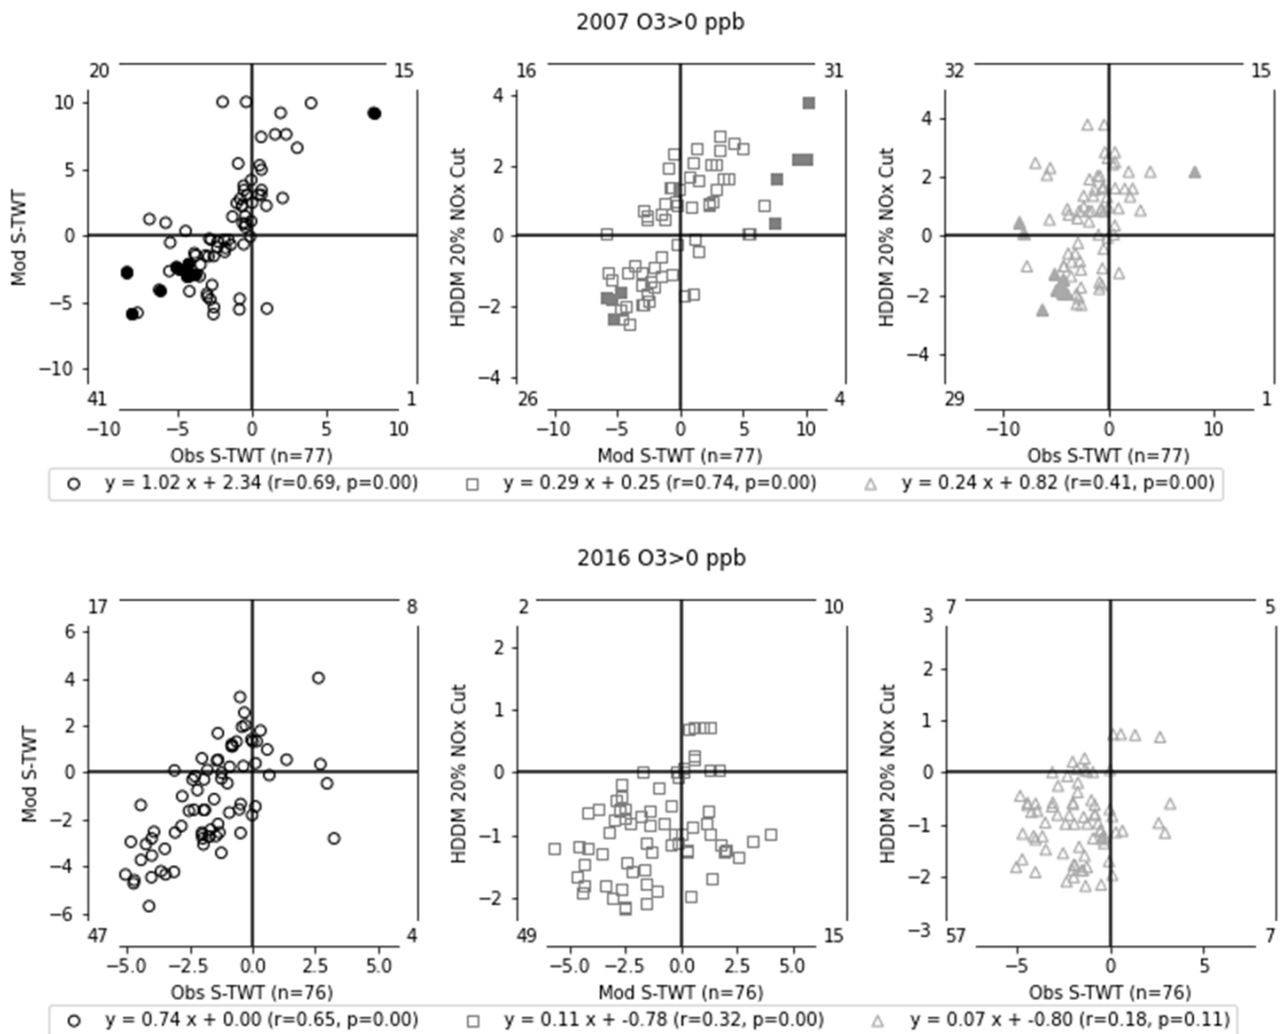

423

424

425 Figure S41. Comparison of (left) modeled vs. observed WE-WD differential, (middle) ozone  
426 response to a 20% NO<sub>x</sub> cut calculated with the HDDM sensitivities vs. modeled WE-WD  
427 differential, and (right) ozone response to a 20% NO<sub>x</sub> cut calculated with the HDDM  
428 sensitivities vs. observed WE-WD differential for (top) 2007 and (bottom) 2016.

429

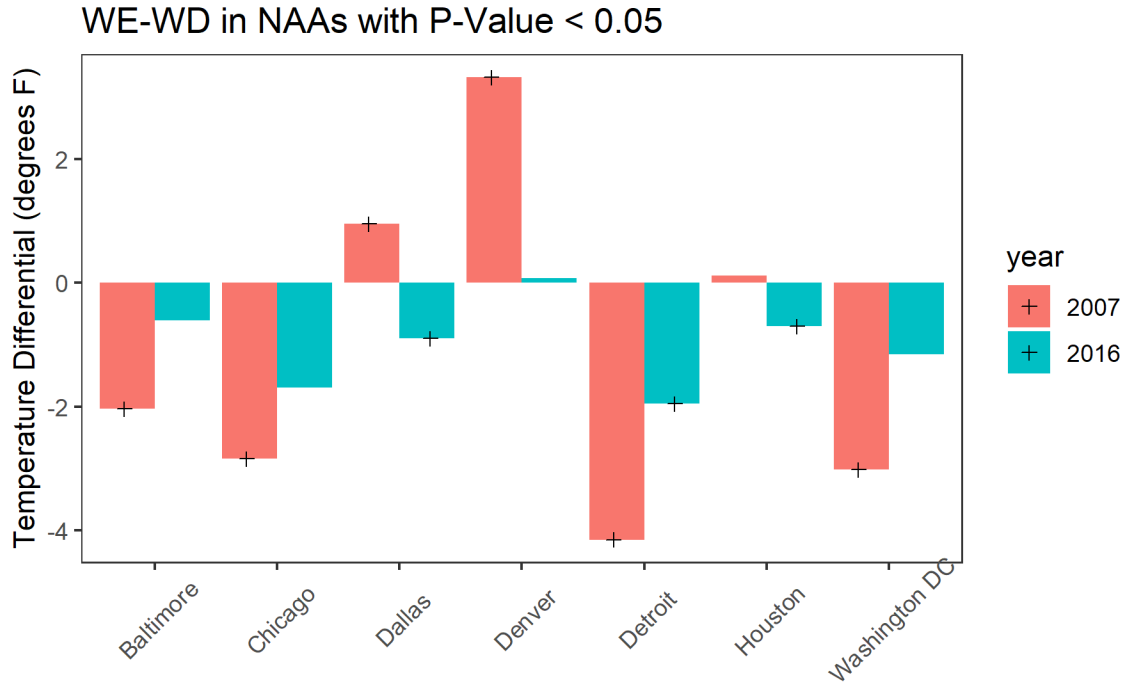

430

431 Figure S42. Non-attainment area (NAA) WE-WD temperature differentials from the AQS  
 432 network with p-value < 0.05 in either 2007 or 2016. Crosses indicate significant p-value for that  
 433 year.
